1  
2  
3  
4  
5  
6  
7  
8  
9  
10  
11  
12  
13  
14  
15  
16

**Unc93b1 recruits Syntenin-1 to dampen TLR7 signaling and prevent autoimmunity**

Olivia Majer<sup>1†</sup>, Bo Liu<sup>1†</sup>, Nevan Krogan<sup>2</sup>, and Gregory M. Barton<sup>1\*</sup>

<sup>1</sup>Division of Immunology and Pathogenesis, Department of Molecular and Cell Biology, University of California, Berkeley, CA 94720, USA.

<sup>2</sup>Department of Cellular and Molecular Pharmacology, University of California, San Francisco, CA 94158, United States

<sup>†</sup>These authors contributed equally to this work

\*Correspondence to: [barton@berkeley.edu](mailto:barton@berkeley.edu)

17 **Abstract**

18 Recognition of nucleic acids enables detection of diverse pathogens by a limited number of innate  
19 immune receptors but also exposes the host to potential autoimmunity. At least two members of the  
20 Toll-like receptor (TLR) family, TLR7 and TLR9, can recognize self RNA or DNA, respectively.  
21 Despite the structural and functional similarities between these receptors, their contribution to  
22 autoimmune diseases such as SLE can be quite different. However, mechanisms of negative regulation  
23 that differentiate between TLR7 and TLR9 have not been described. Here we report a new function for  
24 the TLR trafficking chaperone Unc93b1 that specifically limits TLR7 signaling and prevents TLR7-  
25 dependent autoimmunity. Unc93b1 is known to traffic TLRs from the endoplasmic reticulum to  
26 endosomes, but this new regulatory function does not affect TLR7 localization. Instead, Unc93b1 recruits  
27 Syntenin-1, which inhibits TLR7, but not TLR9, signaling. Syntenin-1 binding requires phosphorylation  
28 of two serine residues on Unc93b1, providing a mechanism for dynamic regulation of the activation  
29 threshold of TLR7. Disruption of the Unc93b1/Syntenin-1 interaction in mice results in TLR7-dependent  
30 autoimmunity. Thus, Unc93b1 not only enables proper trafficking of nucleic acid sensing TLRs but also  
31 sets the activation threshold of these potentially self-reactive receptors.

32

33 **Main**

34 Localization of nucleic acid-sensing TLRs to endosomes favors recognition of microbial  
35 versus self-derived ligands<sup>1-3</sup>. Several mechanisms cooperate to reinforce the compartmentalized  
36 activation of these receptors. First, the extracellular domains of nucleic acid-sensing TLRs must  
37 undergo proteolytic processing by endosomal proteases to generate a functionally competent receptor<sup>4-</sup>  
38 <sup>6</sup>. Second, nucleases in both the extracellular space and in endosomes degrade self-nucleic acids,  
39 reducing the likelihood that sufficient levels of ligand accumulate in endosomes and activate TLRs<sup>7-11</sup>.  
40 Finally, the amount of receptor in endosomes is carefully regulated via expression and sub-cellular  
41 trafficking<sup>12-16</sup>.

42 Altering any one of these general mechanisms can lead to autoimmunity, indicating that  
43 endosomal TLR signaling is carefully balanced to enable discrimination between self and foreign  
44 nucleic acids<sup>3</sup>. In many cases, though, the molecular pathways that control the expression, trafficking,  
45 and signaling of these potentially self-reactive TLRs have not been defined despite the clear relevance  
46 of such pathways to human disease. For example, TLR7 and TLR9 have opposing effects in mouse  
47 models of systemic lupus erythematosus (SLE); disease is exacerbated in TLR9-deficient mice but  
48 attenuated in TLR7-deficient mice<sup>17,18</sup>. Furthermore, *Tlr7* gene duplication can induce SLE in  
49 mice<sup>12,15,16</sup>, while overexpression of TLR9 causes little or no disease<sup>19</sup>. These observations suggest

50 unique mechanisms of TLR7 and TLR9 regulation; however, mechanisms that distinguish endosomal  
51 TLR signaling are unknown.

52 Here we describe a new pathway mediated by the TLR trafficking chaperone Unc93b1 that  
53 differentially regulates the activation threshold of endosomal TLRs. Unc93b1 binds a subset of TLRs  
54 (TLR3, TLR5, TLR7, TLR8, TLR9, TLR11, TLR12, and TLR13) in the endoplasmic reticulum (ER)  
55 and facilitates their trafficking to endosomes<sup>20-22</sup>. Mice and humans lacking Unc93b1 have defective  
56 TLR function and exhibit increased susceptibility to certain viral infections<sup>23</sup>. Mutations in Unc93b1  
57 can also enhance the responses of specific TLRs, leading to autoimmunity<sup>13,14</sup>. These examples of  
58 Unc93b1-mediated modulation of TLR function have been attributed to alterations of TLR  
59 trafficking<sup>13,14</sup>. Here we demonstrate a new mechanism by which Unc93b1 directly influences TLR7  
60 signaling. We show that Unc93b1 recruits Syntenin-1 which dampens TLR7 signaling and limits  
61 responses to self RNA. Our work defines new functions of Unc93b1 and provides a mechanism for  
62 differential regulation of signaling by TLR7 and TLR9.

63

#### 64 **Identification of a region within Unc93b1 that specifically regulates TLR7 responses**

65 Unc93b1 is a twelve-pass transmembrane protein required for the function of all endosomal  
66 TLRs as well as TLR5<sup>22,24,25</sup>, yet mechanistic details regarding Unc93b1 function remain scarce. To  
67 identify regions of the protein involved in TLR regulation we performed a triple alanine mutagenesis  
68 screen of Unc93b1 using a library of 204 mutants covering the N- and C-terminal tail regions as well  
69 as all the loops. Each mutant was stably expressed in a RAW macrophage cell line in which both  
70 endogenous *Unc93b1* alleles were disrupted by Cas9 genome editing. As expected, deletion of  
71 endogenous Unc93b1 led to lack of responses to nucleic acids (Fig. S1a) and failure of TLR7 to traffic  
72 to endosomes (Fig. S1b). To evaluate TLR function in cells expressing each mutant, we stimulated  
73 each line with ligands for TLR3, TLR7, and TLR9 (Unc93b1-dependent TLRs) and TLR4 (an  
74 Unc93b1-independent TLR) and measured TNF $\alpha$  production. Complementing with Unc93b1<sup>WT</sup>  
75 rescued signaling of TLR3, TLR7, and TLR9, while Unc93b1<sup>H412R</sup>, a previously described null  
76 allele<sup>25</sup>, did not (Fig. 1a). These analyses identified several Unc93b1 mutant alleles (PRQ(524-  
77 526)/AAA, PKP(530-532)/AAA, DNS(545-547)/AAA and DES(548-550)/AAA) that enhanced TLR7  
78 responses relative to cells expressing wildtype Unc93b1, without affecting TLR3 or TLR9 responses  
79 (Figs. 1a,b). These mutations were all located within a 33 aa region in the Unc93b1 C-terminal tail  
80 (residues 521 to 553) (Fig. 1d), suggesting that the phenotypes associated with these mutants may be  
81 linked through a common mechanism. TLR7 responses were enhanced in response to the synthetic  
82 ligand R848 as well as to single-stranded RNA, especially when cells were stimulated with low  
83 concentrations of R848 (Fig. 1c). This enhanced signaling was not due to differences in the expression

84 or stability of the Unc93b1 mutants, as protein levels were similar among the RAW macrophage lines  
85 (Fig. S1c).

86 To investigate how mutations in this region of Unc93b1 affect TLR7 signaling, we examined  
87 MAPK and NF $\kappa$ B activation in Unc93b1<sup>PKP/AAA</sup> (hereafter referred to as Unc93b1<sup>PKP</sup>) expressing cells  
88 upon stimulation with R848. Activation of all three MAPKs (p38, JNK and ERK) was stronger and  
89 more rapid in Unc93b1<sup>PKP</sup> cells, compared to Unc93b1<sup>WT</sup> cells (Fig. 1e). Likewise, degradation of  
90 I $\kappa$ B $\alpha$ , a negative regulator of NF $\kappa$ B, occurred with faster kinetics in mutant cells (Fig. 1e). Assembly  
91 of the Myddosome complex, the most proximal signaling step downstream of TLR7 activation, also  
92 occurred more rapidly in Unc93b1<sup>PKP</sup> expressing cells (Fig. 1f). Taken together, these results indicate  
93 that the C-terminal tail of Unc93b1 negatively regulates TLR7 signaling and presumably targets an  
94 early signaling event downstream of the receptor.

95 A previously described mutation (D34A) near the N-terminus of Unc93b1 that enhances TLR7  
96 signaling has been attributed to increased TLR7 export from the ER at the expense of TLR9<sup>14</sup>, so we  
97 considered whether the same mechanism is responsible for the enhanced signaling in C-terminal  
98 mutants. However, trafficking of TLR7 and TLR9 appeared normal in Unc93b1<sup>PKP</sup> expressing cells, as  
99 the cleaved form of both receptors, which represents the endosome-localized receptor, was present at  
100 levels comparable to Unc93b1<sup>WT</sup> expressing cells (Fig. 1g). In contrast, the cleaved form of TLR9 was  
101 absent and TLR9 signaling was defective in Unc93b1<sup>D34A</sup>-expressing cells, consistent with the block  
102 in TLR9 trafficking reported for this mutant<sup>14</sup> (Fig. S2). These results suggested that the C-terminal  
103 region of Unc93b1 specifically regulates TLR7 responses through a novel mechanism.

104

#### 105 **Unc93b1<sup>PKP</sup> leads to enhanced TLR7 signaling without altering TLR7 trafficking or localization**

106 We next investigated the mechanism(s) by which mutations in the Unc93b1 C-terminal tail  
107 lead to enhanced TLR7 responses. We considered the possibility that more TLR7 is exported from the  
108 ER to endosomes in Unc93b1<sup>PKP</sup>-expressing cells, similar to the mechanism proposed for  
109 Unc93b1<sup>D34A</sup>-expressing cells<sup>14</sup>, but multiple observations argued against this model. As noted earlier,  
110 we did not observe any increase in the steady-state level of cleaved TLR7, which represents the  
111 endosomal pool of the receptor, in Unc93b1<sup>PKP</sup>-expressing RAW cells (Fig. 1g). Also, pulse/chase  
112 analysis of TLR7 showed that ectodomain cleavage of TLR7 occurred with similar kinetics in  
113 Unc93b1<sup>WT</sup>- and Unc93b1<sup>PKP</sup>-expressing cells (Fig. 2a), suggesting that TLR7 trafficking to  
114 endosomes is equivalent. Finally, TLR7 levels were equivalent in phagosomes isolated from  
115 Unc93b1<sup>WT</sup>- and Unc93b1<sup>PKP</sup>-expressing cells (Fig. 2b).

116 We also examined TLR7 and Unc93b1 localization directly using immunofluorescence  
117 microscopy. To avoid any aberrant results due to activation of TLR7 in cells ectopically expressing

118 TLR7 and Unc93b1<sup>PKP</sup> (e.g., from RNA released from dead cells in the well), we analyzed localization  
119 in cells lacking Myd88. The extent of colocalization between TLR7 and the late endosomal marker  
120 Lamp1 was similar in cells expressing Unc93b1<sup>WT</sup> and Unc93b1<sup>PKP</sup> but much reduced in cells  
121 expressing the null allele Unc93b1<sup>H412R</sup> (Fig. 2c). There was also no apparent change in colocalization  
122 of Lamp1 with Unc93b1<sup>PKP</sup> itself (Fig. S3). Altogether, these results suggest that the enhanced TLR7  
123 response in Unc93b1<sup>PKP</sup> cells cannot be explained by alterations in TLR7 trafficking and/or  
124 localization.

125

### 126 **Syntenin-1 binds to the Unc93b1 C-terminal tail and inhibits TLR7 signaling**

127 Our findings thus far suggested that the Unc93b1 C-terminal tail might regulate TLR7 signaling  
128 in endosomes through a mechanism unrelated to its function as a trafficking chaperone, either by  
129 interfering with TLR7 signaling directly or by association with proteins that interfere with signaling. To  
130 test the latter possibility, we sought to identify proteins that interact with Unc93b1<sup>WT</sup> but not Unc93b1<sup>PKP</sup>.  
131 One challenging aspect of this approach is the relatively small fraction (<5%) of Unc93b1 in endosomes  
132 relative to the ER (Figs. S3 and S4a). To overcome this obstacle, we enriched for the endosomal pool of  
133 Unc93b1 by isolating phagosomes from RAW cells expressing Unc93b1<sup>WT</sup> or Unc93b1<sup>PKP</sup> and then  
134 purified Unc93b1 protein complexes via anti-FLAG antibodies (see scheme in Fig. S4b). This approach  
135 revealed an approximately 32kDa band present in Unc93b1<sup>WT</sup> samples that was reduced in Unc93b1<sup>PKP</sup>  
136 samples (Fig. 3a). Using tandem mass spectrometry, peptide sequences from the Unc93b1<sup>WT</sup> enriched  
137 band identified Syntenin-1 (also known as syndecan binding protein, SDCBP), which we confirmed by  
138 immunoblot, using an anti-Syntenin-1 monoclonal antibody (Fig. 3b).

139 Syntenin-1 is an adaptor protein that can influence trafficking of transmembrane proteins<sup>26</sup> but  
140 has also been shown to regulate assembly of signaling complexes, including signaling downstream of  
141 TLRs<sup>27</sup>. We could detect Syntenin-1 associated with Unc93b1 in unstimulated RAW macrophages, but  
142 the interaction was rapidly and transiently increased after stimulation with TLR7 ligand (Fig. 3c).  
143 Consistent with our proteomic analyses, Syntenin-1 association with Unc93b1<sup>PKP</sup> was reduced in  
144 unstimulated cells and did not increase after stimulation with TLR7 ligand (Fig. 3c).

145 Based on these results, we considered the possibility that Syntenin-1 negatively regulates TLR7  
146 when bound to Unc93b1. A previous study has suggested that Syntenin-1 can inhibit TLR4 and IL-1  
147 receptor (IL-1R) signaling by interfering with the interaction between IRAK-1 and TRAF6, but whether  
148 Syntenin-1 could inhibit TLR7 signaling was not examined<sup>27</sup>. To test this possibility, we measured the  
149 effect of Syntenin-1 overexpression on TLR7 activation in HEK293T cells, using an NF-κB luciferase  
150 reporter system. Increasing expression of Syntenin-1 substantially reduced TLR7 signaling (Fig. 3d),  
151 whereas activation of NF-κB by TNFα was not affected (Fig. 3e).

152 Since Unc93b1<sup>PKP</sup> had no effect on TLR9 signaling, we asked whether Syntenin-1 recruitment  
153 was specific to TLR7. The increased association between Unc93b1 and Syntenin-1, as seen before (Fig.  
154 3c), only occurred after TLR7 activation, as stimulation with TLR9 ligand did not change the levels of  
155 Syntenin-1 bound to Unc93b1 (Fig. 3f). Presumably, the selective inhibition of TLR7 signaling is based  
156 on the interaction between Syntenin-1 with Unc93b1, which brings Syntenin-1 in close proximity to  
157 TLR7. In an accompanying paper, we demonstrate that TLR9 is released from Unc93b1 within  
158 endosomes while TLR7 and Unc93b1 remain associated<sup>28</sup>. This mechanism likely explains why the  
159 disruption of Syntenin-1 inhibition with the Unc93b1<sup>PKP</sup> mutation does not impact TLR9. Altogether,  
160 these results identify Syntenin-1 as an Unc93b1-binding protein that specifically inhibits TLR7 signaling.  
161

### 162 **Syntenin-1 recruitment to Unc93b1 is regulated through phosphorylation of serine residues in the** 163 **Unc93b1 C-terminal tail**

164 The transiently increased Syntenin-1 binding to Unc93b1 upon TLR7 stimulation prompted us to  
165 investigate mechanisms by which this association could be dynamically regulated. Several global  
166 analyses of cellular phosphorylated proteins have identified potential phosphorylation of two serine  
167 residues (Ser547, Ser550) within the Unc93b1 C-terminal tail<sup>29</sup>. Two triple alanine mutations that  
168 encompass these serines (*Unc93b1*<sup>DNS/AAA</sup> and *Unc93b1*<sup>DES/AAA</sup>) were identified in our original screen as  
169 leading to enhanced TLR7 responses (Fig. 1a), so we considered whether the disruption of  
170 phosphorylation at Ser547 and Ser550 underlies the defective regulation observed for these mutants. In  
171 fact, mutation of Ser547 (*Unc93b1*<sup>S547A</sup>), Ser550 (*Unc93b1*<sup>S550A</sup>), or both serines (*Unc93b1*<sup>S547A/S550A</sup>) to  
172 alanine was sufficient to enhance TLR7 responses to levels comparable to Unc93b1<sup>PKP</sup> (Figs. 4a-c). To  
173 examine directly whether Ser547 and Ser550 of Unc93b1 are phosphorylated in cells, we generated  
174 polyclonal antisera specific for phosphorylated Ser547 and Ser550 within the Unc93b1 C-terminal tail  
175 (Fig. S5a). Using affinity-purified IgG from these sera, we confirmed that Unc93b1 is phosphorylated at  
176 these residues when expressed in RAW cells; mutation of either serine reduced detection by the phospho-  
177 specific Unc93b1 antibodies, while mutation of both serines completely abrogated detection (Fig. S5b).  
178 Based on these results, we conclude that at least some fraction of Unc93b1 is phosphorylated at Ser547 or  
179 Ser550 and that phosphorylation of these residues is necessary to limit TLR7 responses.

180 Next, we sought to determine whether phosphorylation of Ser547 and Ser550 was inhibiting  
181 TLR7 signaling through the same mechanism that we uncovered for Unc93b1<sup>PKP</sup>. Combining the  
182 Unc93b1<sup>PKP</sup> mutation with *Unc93b1*<sup>S547A</sup>, *Unc93b1*<sup>S550A</sup>, or *Unc93b1*<sup>S547A/S550A</sup> did not further enhance  
183 TLR7 responses beyond that observed in Unc93b1<sup>PKP</sup>-expressing cells (Fig. 4a), suggesting that each  
184 mutation acts by disrupting the same mechanism. Indeed, Syntenin-1 recruitment to Unc93b1 after R848

185 stimulation was impaired in Unc93b1<sup>S547A/S550A</sup>-expressing cells (Fig. 4d), indicating that phosphorylation  
186 of Ser547 and Ser550 is required for binding of this negative regulator of TLR7 signaling.

187 In light of these results, the defect in Syntenin-1 recruitment associated with the Unc93b1<sup>PKP</sup>  
188 mutation could either be due to disruption of residues required for direct interaction with Syntenin-1, or,  
189 alternatively, Unc93b1<sup>PKP</sup> may fail to interact with the kinase(s) that phosphorylate(s) Ser547 and Ser550.  
190 To distinguish between these possibilities, we examined phosphorylation of Ser547 and Ser550 in  
191 Unc93b1<sup>PKP</sup>-expressing cells and observed that levels of phosphorylation were equivalent to the levels in  
192 Unc93b1<sup>WT</sup> cells (Fig. 4e). These results support a model in which Syntenin-1 binding to Unc93b1  
193 requires specific residues within the C-terminal tail as well as phosphorylation of Ser547 and Ser550 (Fig.  
194 4f). While some Syntenin-1 is associated with Unc93b1 in unstimulated cells, the interaction is further  
195 increased upon TLR7 signaling. Thus, the mechanism we describe appears not only to influence the initial  
196 threshold of TLR7 activation but also operates as a negative feedback loop to shut down TLR7 signaling.  
197 The signals leading to this increased recruitment as well as the identities of the kinases and phosphatases  
198 regulating phosphorylation of Ser547 and Ser550 are important open questions for future work.

199

#### 200 **SNPs in the Syntenin-1 binding region of human Unc93b1 can enhance TLR7 responses**

201 The 33 aa region in the Unc93b1 C-terminal tail is highly conserved between mouse and  
202 human. To determine if modulation of Unc93b1/Syntenin-1 regulation of TLR7 signaling could be  
203 relevant in humans, we searched publicly available human genomic data for single nucleotide  
204 polymorphisms (SNPs) within the Unc93b1 C-terminal tail. Four very rare (Minor allele frequencies of  
205 0.04% or lower, according to the 1000 Genomes project) coding variants within this region have been  
206 reported: P532T, Y539D, D545V, and D545Y (Fig. 4g). We tested for any functional consequences of  
207 these variants by expressing each in HEK293T cells together with TLR7. Three of the variants  
208 (Unc93b1<sup>Y539D</sup>, Unc93b1<sup>D545V</sup>, and Unc93b1<sup>D545Y</sup>) increased TLR7 responses relative to Unc93b1<sup>WT</sup>,  
209 although Unc93b1<sup>Y539D</sup>, and to a lesser extent Unc93b1<sup>D545Y</sup>, also increased TLR5 responses (Fig. 4g).  
210 These alleles are too rare to be linked to autoimmune disorders via genome-wide association studies, but  
211 the results suggest that modulation of the regulatory mechanism we describe here can influence TLR7  
212 activation thresholds and consequently may impact the likelihood of certain autoimmune diseases.

213

#### 214 **Mutation of the C-terminal regulatory region in Unc93b1 leads to TLR7-dependent** 215 **autoimmunity**

216 Finally, we sought to test the importance of Unc93b1/Syntenin-1 regulation of TLR7 for self  
217 versus non-self discrimination *in vivo*. We considered that analysis of Syntenin-1 deficient mice could  
218 be complicated for multiple reasons. First, Syntenin-1 has been implicated in the regulation of

219 multiple transmembrane proteins, and Syntenin-1 deficient mice show pleiotropic effects on the  
220 immune system and the microbiota<sup>30</sup>. In addition, Syntenin-2, a highly homologous protein may  
221 compensate for Syntenin-1 deficiency. To sidestep these potential issues, we introduced the  
222 *Unc93b1*<sup>PKP</sup> mutation into the germline of mice using Cas9 genome editing (Fig. S6a). This mutation  
223 disrupts interaction with Syntenin-1 but should leave other Syntenin-1 functions unaffected. We  
224 obtained an *Unc93b1*<sup>WT/PKP</sup> founder, backcrossed this founder to C57BL/6J for 1 generation, and  
225 intercrossed *Unc93b1*<sup>WT/PKP</sup> mice to generate *Unc93b1*<sup>WT/WT</sup>, *Unc93b1*<sup>WT/PKP</sup>, and *Unc93b1*<sup>PKP/PKP</sup>  
226 offspring for analysis. *Unc93b1*<sup>PKP/PKP</sup> mice were born below the expected Mendelian frequency and  
227 were severely runted (Fig. 5a). These mice exhibited hallmarks of systemic inflammation and  
228 autoimmunity, including increased frequencies of activated T cells, loss of marginal zone (MZ) B  
229 cells, increased frequencies of MHC<sup>hi</sup> dendritic cells, and increased frequencies of inflammatory  
230 monocytes in secondary lymphoid organs (Fig. 5b). *Unc93b1*<sup>PKP/PKP</sup> mice developed anti-nuclear  
231 antibodies (ANA) very early in life (Fig. 5c). *Unc93b1*<sup>WT/PKP</sup> mice also showed signs of immune  
232 dysregulation but not to the same extent as *Unc93b1*<sup>PKP/PKP</sup> mice (Figs. 5a-c).

233 The phenotype of *Unc93b1*<sup>PKP/PKP</sup> mice demonstrates that disruption of the *Unc93b1*/Syntenin-  
234 1 interaction decreases the activation threshold of TLR7, enabling responses to self RNA. To test this  
235 hypothesis, we examined the function of *Unc93b1*-dependent TLRs in cells from *Unc93b1*<sup>PKP</sup>-  
236 expressing mice. Bone marrow-derived dendritic cells (BMDCs) and macrophages (BMMs) from  
237 *Unc93b1*<sup>WT/PKP</sup> and *Unc93b1*<sup>PKP/PKP</sup> mice mounted stronger responses to TLR7 ligands compared to  
238 *Unc93b1*<sup>WT/WT</sup> cells, while responses to TLR9 and TLR4 ligands were equivalent (Figs. 5d,e and S6b).  
239 Consistent with the model that Syntenin-1 alters the activation threshold of TLR7, enhanced responses  
240 to R848 were most evident at low ligand concentrations (Fig. 5e). In line with the enhanced cytokine  
241 production, macrophages from *Unc93b1*<sup>PKP/PKP</sup> mice showed accelerated and stronger assembly of the  
242 Myddosome complex downstream of TLR7 activation (Fig. 5f). These enhanced TLR7 responses were  
243 not due to differences in *Unc93b1* expression, as *Unc93b1* protein levels were similar in BMMs from  
244 *Unc93b1*<sup>WT/WT</sup>, *Unc93b1*<sup>WT/PKP</sup>, and *Unc93b1*<sup>PKP/PKP</sup> mice (Fig. S6c).

245 To test whether TLR7 function is required for the disease in *Unc93b1*<sup>PKP/PKP</sup> mice we  
246 generated *Unc93b1*<sup>PKP/PKP</sup>*Tlr7*<sup>-/-</sup> mice. Lack of TLR7 completely rescued disease as weight, numbers  
247 of activated T cells, numbers of MZ B cells, and frequencies of ANA were equivalent between  
248 *Unc93b1*<sup>PKP/PKP</sup>*Tlr7*<sup>-/-</sup> and *Unc93b1*<sup>WT/WT</sup> mice (Figs. 5c,g). These results indicate that *Unc93b1*  
249 specifically limits TLR7-driven autoimmunity, presumably based on recognition of self-RNA, through  
250 recruitment of Syntenin-1.

251



252           These findings identify a new mechanism that specifically limits TLR7 signaling and  
253 consequently prevents responses against self-RNA. We propose a model whereby the C-terminal tail of  
254 Unc93b1 binds the negative regulator Syntenin-1, which is further recruited upon TLR7 activation and  
255 controls the threshold of TLR7 signaling (Fig. 6). Disrupting the binding site or recruitment of Syntenin-1  
256 through mutations in Unc93b1 results in uncontrolled TLR7 responses that lead to a break in self-  
257 tolerance and autoimmunity. Syntenin-1 has been previously described as a versatile adaptor protein that  
258 regulates multiple signaling complexes in the cell. Our work suggests that Syntenin-1 can interfere with  
259 TLR7 signaling directly. This inhibition acts early in TLR7 signaling, affecting assembly of the  
260 Myddosome and subsequent downstream signaling. The precise mechanism by which Syntenin-1 inhibits  
261 Myddosome assembly remains unclear, but it seems likely that binding of Syntenin-1 to one or more  
262 signaling components prevents stable assembly of the multi-protein complex. Thus, Unc93b1 appears to  
263 serve as a regulatory scaffolding protein, bridging TLR7 with a negative regulator that prevents signal  
264 initiation.

265           Previously described functions of Unc93b1 have been limited to control of TLR trafficking; our  
266 work clearly expands the scope of Unc93b1 function and suggests that this protein controls TLR function  
267 at multiple levels. One particularly interesting aspect of the mechanism we describe here is its selectivity  
268 for regulation of TLR7, especially considering the differential roles played by TLR7 and TLR9 in mouse  
269 models of SLE. The disease observed in *Unc93b1<sup>PKP/PKP</sup>* mice was entirely TLR7 dependent, and there  
270 was no evidence of enhanced TLR9 signaling in these mice. In an accompanying manuscript<sup>28</sup>, we  
271 describe a mechanism that explains this selectivity: while Unc93b1 remains associated with TLR7 in  
272 endosomes, TLR9 is released and is therefore no longer subject to inhibition by Syntenin-1. Thus, our  
273 work provides the first mechanistic basis for differential regulation of TLR7 and TLR9, which may be  
274 relevant for human autoimmune diseases. We demonstrate that genetic variants in the C-terminal tail of  
275 human Unc93b1 can alter TLR7 responses, but even more intriguing is the possibility that Syntenin-1  
276 recruitment to Unc93b1 can be dynamically controlled through phosphorylation or dephosphorylation of  
277 Ser547 and Ser550. Identifying the players involved in this regulation should reveal critical determinants  
278 that influence self versus non-self discrimination.

## 279 **Methods**

280

### 281 Antibodies and Reagents

282 The following antibodies were used for immunoblots and immunoprecipitations: anti-HA as purified  
283 antibody or matrix (3F10, Roche), anti-FLAG as purified antibody or matrix (M2, Sigma-Aldrich), anti-  
284 mLamp-1 (AF4320, R&D Systems), anti-Calnexin (ADI-SPA-860, Enzo Life Sciences), anti-Gapdh  
285 (GT239, GeneTex), anti-Myd88 (AF3109, R&D Systems), anti-IRAK2 (Cell Signaling), anti-Phospho-  
286 p38 (Cell Signaling), anti-p38 (Cell Signaling), anti-Phospho-SAPK/JNK (81E11, Cell Signaling), anti-  
287 SAPK/JNK (56G8, Cell Siganling), anti-Phospho-p44/42 (ERK1/2) (D13.14.4E, Cell Signaling), anti-  
288 p44/42 (ERK1/2) (137F5, Cell Siganling), anti-I $\kappa$ B $\alpha$  (Cell Signaling), anti-Syntenin-1 (2C12, Novusbio),  
289 anti-Unc93b1 (PA5-20510, Thermo Scientific), goat anti-mouse IgG-AlexaFluor680 (Invitrogen), goat  
290 anti-mouse IgG-AlexaFluor680 (Invitrogen), rabbit anti-goat IgG-AlexaFluor680 (Invitrogen), goat anti-  
291 mouse IRDye 800CW (Licor), donkey anti-rabbit IRDye 680RD (Licor), goat anti-rat IRDye 800CW  
292 (Licor). Antibodies for immunofluorescence were: rat anti-HA (3F10, Roche), rabbit anti-Lamp1  
293 (ab24170, Abcam), goat anti-rat IgG-AlexaFluor488 (Jackson ImmunoResearch), goat anti-rabbit IgG-  
294 AlexaFluor647 (Jackson ImmunoResearch). Cells were mounted in Vectashield Hard Set Mounting  
295 Medium for Fluorescence (Vector Laboratories). For ELISA: anti-mouse TNF $\alpha$  purified (1F3F3D4,  
296 eBioscience), anti-mouse TNF $\alpha$ -biotin (XT3/XT22, eBioscience), Streptavidin-HRP (BD Pharmingen).  
297 Antibodies and reagents used for flow cytometry were: anti-TNF $\alpha$  (MP6-XT22, eBioscience), purified  
298 anti-CD16/32 Fc Block (2.4G2), CD3 $\epsilon$  (145-2C11, BioLegend), CD4 (GK1.5, BioLegend), CD8 (53-6.7,  
299 BioLegend), CD44 (IM7, eBioscience), CD62L (MEL-14, eBioscience), CD69 (H1.2F3, eBioscience),  
300 CD1d (1B1, eBioscience), B220 (RA3-6B2, Invitrogen), CD19 (6D5, BioLegend), IgD (11-26c.2a,  
301 BioLegend), IgM (eB121-15F9, eBioscience), CD21 (eBio8D9, eBioscience), CD23 (B3B4,  
302 eBioscience), CD138 (281-2, BioLegend), CD11b (M1/70, BioLegend), Ly6G (1A8, TONBO  
303 biosciences), Ly6C (HK1.4, BioLegend), F4/80 (CI:A3-1, AbD serotec), MHCII (M5/114.15.2,  
304 eBioscience), CD86 (GL1, eBioscience), CD11c (N418, BioLegend). For ANA detection: anti-mouse  
305 IgG-AlexaFluor 488 (Jackson ImmunoResearch), anti-mouse IgM-FITC (Invitrogen).

306 The antibody against phosphorylated Unc93b1 was generated by Invitrogen against synthesized  
307 phospho-peptide (YLEEDN(pS)DE(pS)DMEGEQ) using their “Rabbit, 90-Day immunization” protocol.  
308 Antibody in sera was enriched with immobilized phospho-peptide, followed by negative absorption with  
309 unphosphorylated peptide.

310

311 CpG-B (ODN1668: TCCATGACGTTCCCTGATGCT, all phosphorothioate linkages) was synthesized by  
312 Integrated DNA Technologies. R848, PolyIC HMW, ssRNA40/LyoVec, and LPS were purchased from

313 InvivoGen. Human IL-1b was from Invitrogen. NP-40 (Igepal CA-630) was from Sigma-Aldrich.  
314 Lipofectamine-LTX reagent (Invitrogen) and OptiMEM-I (Invitrogen) were used for transfection of  
315 plasmid DNA. ProMag 1 Series-COOH Surfactant free magnetic beads (#25029) for phagosome  
316 preparations were purchased from Polysciences. For luciferase assays: Renilla substrate: Coelenterazine  
317 native (Biotum), Firefly substrate: Luciferin (Biosynth), Passive Lysis Buffer, 5x (Promega).

### 318 319 Animals

320 Mice were housed under specific-pathogen-free conditions at the University of California, Berkeley. All  
321 mouse experiments were performed in accordance with the guidelines of the Animal Care and Use  
322 Committee at UC Berkeley. Unless noted mice were analyzed at 5-8 weeks of age. C57BL/6J and TLR7<sup>-/-</sup>  
323 mice (on the C57BL/6J background) were from the Jackson Laboratory. Unc93b1<sup>PKP</sup> mice were generated  
324 using Cas9 genome editing. The guide RNA used was: TGCTGTGGCTTCGGAATGCGCGG. The single  
325 stranded oligo template contained 60bp homology arms on both sides and four phosphothioate linkages at  
326 the ends (one at the 5' and three at the 3' end of the oligo). Briefly, female C57BL/6J mice at 4 weeks of  
327 age were superovulated and mated overnight with C57BL/6J male mice (>8 weeks old). Zygotes were  
328 harvested from superovulated females and were placed in KSOM medium (Millipore) before use.  
329 CRISPR/Cas9 mixture was prepared in final concentration of *cas9* mRNA (100ng/ul), sgRNA (50ng/ul)  
330 and single stranded oligo (100ng/ul). The CRISPR/Cas9 mixture was microinjected into 80 zygotes using  
331 a micromanipulator (Narishige) and microscope (Nikon). After microinjection, 67embryos were  
332 transferred to three CD1 recipients via oviduct transfer. Offspring was genotyped by sequencing for the  
333 correct targeted allele and further bred to ensure germline transmission.

### 334 335 Unc93b1 library design and plasmid constructs

336 The Unc93b1 mutagenesis library has been generated by Invitrogen. Briefly, the mouse Unc93b1 gene  
337 was optimized for the codon bias of *Mus musculus* and regions of very high (>80%) and very low (<30%)  
338 GC content have been avoided. The codon-optimized mouse Unc93b1 gene was c-terminally tagged with  
339 3xFLAG (DYKDHDGDYKDHDIDYKDDDDK) and subjected to a triple-alanine scanning mutagenesis  
340 spanning sequences corresponding to tail and loop regions of the protein. The individual mutant  
341 constructs were cloned into a custom-made MSCV-based retroviral vector carrying an IRES-driven  
342 PuromycinR-T2A-mCherry double-selection. The library was provided as 204 individual plasmids.

343 For additional site-directed mutagenesis, AccuPrime Pfx DNA polymerase (Invitrogen) was used  
344 following the QuikChange II Site-directed Mutagenesis protocol from Agilent Technologies. The  
345 following MSCV-based retroviral vectors were used to express TLR7 and TLR9 in cell lines: MSCV2.2  
346 (IRES-GFP), MSCV-Thy1.1 (IRES-Thy1.1), or MIGR2 (IRES-hCD2). TLR7 and TLR9 were fused to

347 HA (YPYDVDPDYA) at the C-terminal end. TLR7 sequence was synthesized after codon optimization by  
348 Invitrogen's GeneArt Gene Synthesis service<sup>22</sup>.

349 Syntenin-1 expression vector was from Addgene (89435). Traf6 expression vector was a kind gift  
350 from Jonathan Kagan (Boston Children's Hospital).

351

### 352 Cells and tissue culture conditions

353 HEK293T (from ATCC) and GP2-293 packaging cell lines (Clontech) were cultured in DMEM complete  
354 media supplemented with 10% (vol/vol) FCS, L-glutamine, penicillin-streptomycin, sodium pyruvate,  
355 and HEPES (pH 7.2) (Invitrogen). RAW264 macrophage cell lines (ATCC) were cultured in RPMI 1640  
356 (same supplements as above). BMMs were differentiated for seven days in RPMI complete media (same  
357 supplements as above plus 0.00034% (vol/vol) beta-mercaptoethanol) and supplemented with M-CSF  
358 containing supernatant from 3T3-CSF cells, as previously described.

359 To generate HEK293T Unc93b1<sup>-/-</sup> cells, guide RNAs were designed and synthesized as gBlocks  
360 as previously described<sup>31</sup> and then were subcloned into pUC19 (guide RNA:  
361 CTCACCTACGGCGTCTACC). Humanized Cas9-2xNLS-GFP was a gift from the Doudna laboratory,  
362 University of California, Berkeley, CA. HEK293T cells were transfected using Lipofectamine LTX with  
363 equal amounts of the guide RNA plasmid and Cas9 plasmid. Seven days post transfection cells were  
364 plated in a limiting-dilution to obtain single cells. Correct targeting was verified by PCR analysis and loss  
365 of response to TLR9 and TLR7 stimulation in an NFkB luciferase assay. Unc93b1<sup>-/-</sup> RAW macrophages  
366 were generated with the Cas9(D10A)-GFP nickase (guide RNAs: 1)  
367 GGCGCTTGC GGCGGTAGTAGCGG, 2) CGGAGTGGTCAAGAACGTGCTGG, 3)  
368 TTCGGAATGCGCGGCTGCCGCGG, 4) AGTCCGCGGCTACCGCTACCTGG). Macrophages were  
369 transfected with cas9(D10A) and all four guide RNAs using Lipofectamine LTX and Plus reagent and  
370 single cell-sorted on cas9-GFP two days later. Correct targeting was verified by loss of response to TLR7  
371 stimulation and sequencing of the targeted region after TOPO cloning. Myd88 was knocked out in  
372 Unc93b1<sup>-/-</sup> RAW macrophages stably expressing TLR7-HA and either Unc93b1<sup>WT</sup> or Unc93b1<sup>PKP</sup>. Cas9  
373 transfection and screening of cells was performed as before, except for using Cas9-2xNLS-GFP (guide  
374 RNA: GGTCAAGAAGACAGCGATAGG).

375

### 376 Retroviral transduction

377 Retroviral transduction of RAW macrophages was performed as previously described<sup>22</sup>. For macrophages  
378 expressing the Unc93b1 mutant library, transduced cells were selected with puromycin starting 48h after  
379 transduction and the efficiency of drug selection was verified by equal mCherry expression of target cells.  
380 When necessary, target cells were sorted on a Becton Dickinson Aria Fusion Sorter to match Unc93b1

381 expression levels using the bicistronic fluorescent reporter. For retroviral transduction of bone marrow  
382 derived macrophages, bone marrow was harvested and cultured in M-CSF-containing RPMI for two days.  
383 Progenitor cells were transduced with viral supernatant (produced as above) on two successive days by  
384 spinfection for 90 min at 32°C. 48h after the second transduction cells were put on Puromycin selection  
385 and cultured in M-CSF-containing RPMI media until harvested on day 8.

386

#### 387 Pulse-chase

388 Cells were seeded into 6 cm dishes the day before. After washing in PBS, cells were starved for 1 h in  
389 cysteine/methionine-free media (Corning) containing 10% dialyzed serum (dialyzed in PBS for two days  
390 using a 10 kD Snakeskin), then pulsed with 0.25 mCi/ml <sup>35</sup>S-cysteine/methionine (EasyTag Express  
391 Protei Labeling Mix, Perkin-Elmer). After a 45-min pulse, cells were washed and cultured in 5 ml chase  
392 media containing 0.45 mg/ml L-cysteine and L-methionine or harvested as the zero time point. Time  
393 points were harvested as follows: cells were washed twice in 2 ml PBS, then scraped in PBS and cell  
394 pellets were subjected to HA immunoprecipitation.

395

#### 396 Cell fractionation by sucrose density-centrifugation

397 Cells in four confluent 15 cm dishes were washed in ice-cold PBS, scraped in 10 ml sucrose  
398 homogenization buffer (SHB: 250 μM sucrose, 3 mM imidazole pH 7.4) and pelleted by centrifugation.  
399 Cells were resuspended in 2 ml SHB plus protease inhibitor cocktail with EDTA (Roche) and 1mM  
400 PMSF and disrupted by 25 strokes in a steel dounce homogenizer. The disrupted cells were centrifuged  
401 for 10min at 1000g to remove nuclei. Supernatants were loaded onto continuous sucrose gradients  
402 (percent iodixanol: 0, 10, 20, 30) and ultracentrifuged in an SW41 rotor at 25800 rpm for 2 h (Optima L-  
403 90K Ultracentrifuge, Beckman Coulter). 22 fractions of 420 μl were collected from top to bottom. 100 μl  
404 of each fraction were denatured in SDS buffer for western blot analysis. For immunoprecipitations, three  
405 fractions corresponding to ER or endosomes were combined and lysed for 1h after addition of protease  
406 inhibitor cocktail and NP-40 to a final concentration of 1%. Coimmunoprecipitation with anti-HA matrix  
407 was performed as described below.

408

#### 409 Luciferase assays

410 Activation of NF-κB in HEK293T cells was performed as previously described<sup>4</sup>. Briefly, transfections  
411 were performed in OptiMEM-I (Invitrogen) with LTX transfection reagent (Invitrogen) according to  
412 manufacturer's guidelines. Cells were stimulated with CpG-B (200 nM – 1 μM), R848 (100-200 ng/ml),  
413 or human IL-1b (20 ng/ml) after 24 h and lysed by passive lysis after an additional 12–16 h. Luciferase  
414 activity was measured on an LMaxII-384 luminometer (Molecular Devices).

415

416 Immunoprecipitation, western blot, and dot blot

417 Cells were lysed in NP-40 buffer (50 mM Tris [pH 7.4], 150 mM NaCl, 0.5% NP-40, 5 mM EDTA,  
418 supplemented with 1mM PMSF, Roche complete protease inhibitor cocktail and PhosSTOP tablets).  
419 After incubation at 4°C for 1 h, lysates were cleared of insoluble material by centrifugation. For  
420 immunoprecipitations, lysates were incubated with anti-HA matrix or anti-FLAG matrix (both pre-  
421 blocked with 1% BSA-PBS) for at least 2 h, and washed four times in lysis buffer. Precipitated proteins  
422 were eluted in lysis buffer containing 200 ng/ml HA or 3xFLAG peptide, or denatured in SDS loading  
423 buffer at room temperature for 1 h. Proteins were separated by SDS-PAGE (Bio-Rad TGX precast gels)  
424 and transferred to Immobilon PVDF membranes (Millipore) in a Trans-Blot Turbo transfer system (Bio-  
425 Rad). Membranes were blocked with Odyssey blocking buffer, probed with the indicated antibodies and  
426 developed using the Licor Odyssey Blot Imager. For dot blot: diluted peptides were dropwise added to  
427 nitrocellulose blotting membranes (GE Healthcare). Membranes were dried at room temperature, blocked  
428 and probed using the Licor Odyssey blot system.

429 Cell lysis and co-immunoprecipitations for Myddosome analyses were performed in the following buffer:  
430 50 mM Tris-HCl pH 7.4, 150 mM NaCl, 10% glycerol, 1% NP-40 and supplemented with EDTA-free  
431 complete protease inhibitor cocktail (Roche), PhosSTOP (Roche) and 1 mM PMSF. Lysates were  
432 incubated overnight with anti-Myd88 antibody at 4°C, and then Protein G agarose (pre-blocked with 1%  
433 BSA-PBS) was added for additional 2 h. Beads were washed four times in lysis buffer, incubated in SDS  
434 loading buffer at room temperature for 1h, separated by SDS-PAGE, and probed with the indicated  
435 antibodies.

436

437 Tissue harvest

438 Spleens and lymph nodes were digested with collagenase XI and DNase I for 30min and single cell  
439 suspensions were generated by mechanical disruption. Red blood cells were lysed in ACK Lysing Buffer  
440 (Gibco).

441

442 Flow cytometry

443 Cells were seeded into non-treated tissue culture 24-well plates or round-bottom 96-well plates. The next  
444 day cells were stimulated with the indicated TLR ligands. To measure TNF $\alpha$  production, BrefeldinA (BD  
445 GolgiPlug, BD Biosciences) was added to cells 30 min after stimulation, and cells were collected after an  
446 additional 5.5 h. Dead cells were excluded using a fixable live/dead stain (Violet fluorescent reactive dye,  
447 Invitrogen). Cells were stained for intracellular TNF $\alpha$  with a Fixation & Permeabilization kit according to  
448 manufacturer's instructions (eBioscience).

449 For flow cytometry on mouse cells, dead cells were excluded using a fixable live/dead stain (Aqua  
450 fluorescent reactive dye, Invitrogen) or DAPI and all stains were carried out in PBS containing 1% BSA  
451 (w/v) and 0.1% Azide (w/v) including anti-CD16/32 blocking antibody. Cells were stained for 20 min at  
452 4°C with surface antibodies. Data were acquired on a LSRFortessa analyzer (BD Biosciences).

453

#### 454 Enzyme-linked immunosorbent assay (ELISA) and Cytometric bead array (CBA)

455 Cells were seeded into tissue culture-treated flat-bottom 96-well plates. The next day cells were  
456 stimulated with the indicated TLR ligands. For TNF $\alpha$  ELISAs, NUNC Maxisorp plates were coated with  
457 anti-TNF $\alpha$  at 1.5  $\mu$ g/ml overnight at 4°C. Plates were then blocked with PBS + 1% BSA (w/v) at 37°C for  
458 1 h before cell supernatants diluted in PBS + 1% BSA (w/v) were added and incubated at room  
459 temperature for 2 h. Secondary anti-TNF $\alpha$ -biotin was used at 1  $\mu$ g/ml followed by Streptavidin-HRP.  
460 Plates were developed with 1 mg/mL OPD in Citrate Buffer (PBS with 0.05 M NaH<sub>2</sub>PO<sub>4</sub> and 0.02 M  
461 Citric acid, pH 5.0) with HCl acid stop.

462 For CBA, cell supernatants were collected as above and analyzed using the Mouse Inflammation Kit (BD  
463 Biosciences) according to the manufacturer's instructions.

464

#### 465 ANA staining

466 Mouse sera were diluted 1:80 in 1% BSA-PBS and applied to MBL Bion Hep-2 antigen substrate IFA test  
467 system for 1 h at room temperature. Slides were washed 3 times with PBS and incubated for 30 min with  
468 a mixture of fluorophore-conjugated secondary antibodies against anti-mouse IgG and IgM. Slides were  
469 washed 3 times and incubated with DAPI for 5 minutes. After rinsing once with PBS, slides were  
470 mounted in VectaShield Hard Set, and imaged on a Zeiss AxioZoom Z.1 slide scanner.

471

#### 472 Microscopy

473 Cells were plated onto coverslips and allowed to settle overnight. Coverslips were washed with PBS,  
474 fixed with 4% PFA-PBS for 15 min, and permeabilized with 0.5% saponin-PBS for 5 min. To quench  
475 PFA autofluorescence coverslips were treated with sodium borohydride/0.1% saponin-PBS for 10 min.  
476 After washing 3x with PBS, cells were blocked in 1% BSA/0.1% saponin-PBS for 1 h. Slides were  
477 stained in blocking buffer with anti-HA and anti-LAMP1 (see antibodies above), washed with PBS and  
478 incubated for 45 min with secondary antibodies. Cells were washed 3x in PBS and mounted in  
479 VectaShield Hard Set. Cells were imaged on a Zeiss Elyra PS.1 with a 100x/1.46 oil immersion objective  
480 in Immersol 518F / 30°C (Zeiss). Z-Sections were acquired, with three grid rotations at each Z-position.  
481 The resulting dataset was SIM processed and Channel Aligned using Zeiss default settings in Zen. The  
482 completed super-resolution Z-Series was visualized and analyzed using Fiji<sup>32</sup>. To compare the degree of

483 colocalization of two proteins a single section from the middle of the Z-Series was selected and analyzed  
484 using a customized pipeline for object-based colocalization in Cell Profiler<sup>33</sup>. Briefly, primary objects  
485 (TLR7 vs Lamp1, or Unc93b1 vs Lamp1) were identified and related to each other to determine the  
486 degree of overlap between objects. Data are expressed as % of object 1 colocalized with object 2.

487

#### 488 Phagosome isolation and protein complex purification

489 Cells in a confluent 15cm dish were incubated with  $\sim 10^8$  1  $\mu\text{m}$  magnetic beads (Polysciences) for 4 h.  
490 After rigorous washing in PBS, cells were scraped into 10 ml sucrose homogenization buffer (SHB:  
491 250  $\mu\text{M}$  sucrose, 3 mM imidazole, pH 7.4) and pelleted by centrifugation. Cells were resuspended in 2 ml  
492 SHB plus protease inhibitor cocktail with EDTA (Roche) and 1mM PMSF and disrupted by 25 strokes in  
493 a steel dounce homogenizer. The disrupted cells were gently rocked for 10 min on ice to free endosomes.  
494 Beads were collected with a magnet (Dyna) and washed 4x with SHB plus protease inhibitor. After the  
495 final wash, phagosome preparations were denatured in 2x SDS buffer at room temperature for 1 h and  
496 analyzed by western blot.

497 For protein complex purification, phagosome preparations were lysed in NP-40 buffer (50 mM Tris, pH  
498 7.4, 150 mM NaCl, 0.5% NP-40, 5 mM EDTA, supplemented with 1 mM PMSF, complete protease  
499 inhibitor cocktail and PhosSTOP tablets (Roche) on ice for 1 h. Magnetic beads were removed by magnet  
500 and insoluble components were precipitated by 15,000 g spin for 20 min. Lysate was incubated with anti-  
501 FLAG matrix for 3 h, followed by four washes in lysis buffer. Proteins were eluted in NP-40 buffer  
502 containing 200 ng/ml 3xFLAG peptide, and were further applied to western blot, silver stain or Trypsin  
503 in-solution digest for mass spectrometry.

504

#### 505 Mass Spectrometry

506 Proteins were simultaneously extracted from a gel slice and digested with trypsin, and the resulting  
507 peptides were dried and resuspended in buffer A (5% acetonitrile/ 0.02% heptafluorobutyric acid (HBFA)).  
508 A nano LC column that consisted of 10 cm of Polaris c18 5  $\mu\text{m}$  packing material (Varian) was packed in a  
509 100  $\mu\text{m}$  inner diameter glass capillary with an emitter tip. After sample loading and washed extensively  
510 with buffer A, the column was then directly coupled to an electrospray ionization source mounted on a  
511 Thermo-Fisher LTQ XL linear ion trap mass spectrometer. An Agilent 1200 HPLC equipped with a split  
512 line so as to deliver a flow rate of 300 nl/min was used for chromatography. Peptides were eluted using a  
513 90 min. gradient from buffer A to 60% Buffer B (80% acetonitrile/ 0.02% HBFA).

514 Protein identification and quantification were done with IntegratedProteomics Pipeline (IP2,  
515 Integrated Proteomics Applications, Inc. San Diego, CA) using ProLuCID/Sequest, DTASelect2 and  
516 Census. Tandem mass spectra were extracted from raw files using RawExtractor and were searched



517 against the mouse protein database (obtained from UNIPROT) plus sequences of common contaminants,  
518 concatenated to a decoy database in which the sequence for each entry in the original database was  
519 reversed. LTQ data was searched with 3000.0 milli-amu precursor tolerance and the fragment ions were  
520 restricted to a 600.0 ppm tolerance. All searches were parallelized and searched on the VJC proteomics  
521 cluster. Search space included all fully tryptic peptide candidates with no missed cleavage restrictions.  
522 Carbamidomethylation (+57.02146) of cysteine was considered a static modification. We required 1  
523 peptide per protein and both tryptic termini for each peptide identification. The ProLuCID search results  
524 were assembled and filtered using the DTASelect program with a peptide false discovery rate (FDR) of  
525 0.001 for single peptides and a peptide FDR of 0.005 for additional peptide s for the same protein. Under  
526 such filtering conditions, the estimated false discovery rate was zero for the datasets used.

527

### 528 Quantification and Statistical Analysis

529 Statistical parameters, including the exact value of n and statistical significance, are reported in the  
530 Figures and Figure Legends, whereby n refers to the number of repeats within the same experiment.  
531 Representative images have been repeated at least three times, unless otherwise stated in the figure  
532 legends. Data is judged to be statistically significant when  $p < 0.05$  by Student's t-test. To compare the  
533 means of several independent groups, a one-way ANOVA followed by a Tukey's posttest was used. In  
534 figures, asterisks denote statistical significance (\*,  $p < 0.05$ ; \*\*,  $p < 0.01$ ; \*\*\*,  $p < 0.001$ ). Statistical analysis  
535 was performed in GraphPad PRISM 7 (Graph Pad *Software* Inc.).

536

537

538 **References**

- 539 1 Barton, G. M., Kagan, J. C. & Medzhitov, R. Intracellular localization of Toll-like  
540 receptor 9 prevents recognition of self DNA but facilitates access to viral DNA. *Nat*  
541 *Immunol* **7**, 49-56, doi:10.1038/ni1280 (2006).
- 542 2 Kagan, J. C. & Barton, G. M. Emerging principles governing signal transduction by  
543 pattern-recognition receptors. *Cold Spring Harb Perspect Biol* **7**, a016253,  
544 doi:10.1101/cshperspect.a016253 (2014).
- 545 3 Majer, O., Liu, B. & Barton, G. M. Nucleic acid-sensing TLRs: trafficking and  
546 regulation. *Curr Opin Immunol* **44**, 26-33, doi:10.1016/j.coi.2016.10.003 (2017).
- 547 4 Ewald, S. E. *et al.* The ectodomain of Toll-like receptor 9 is cleaved to generate a  
548 functional receptor. *Nature* **456**, 658-662, doi:10.1038/nature07405 (2008).
- 549 5 Garcia-Cattaneo, A. *et al.* Cleavage of Toll-like receptor 3 by cathepsins B and H is  
550 essential for signaling. *Proc Natl Acad Sci U S A* **109**, 9053-9058,  
551 doi:10.1073/pnas.1115091109 (2012).
- 552 6 Park, B. *et al.* Proteolytic cleavage in an endolysosomal compartment is required for  
553 activation of Toll-like receptor 9. *Nat Immunol* **9**, 1407-1414, doi:10.1038/ni.1669  
554 (2008).
- 555 7 Baum, R. *et al.* Cutting edge: AIM2 and endosomal TLRs differentially regulate  
556 arthritis and autoantibody production in DNase II-deficient mice. *J Immunol* **194**,  
557 873-877, doi:10.4049/jimmunol.1402573 (2015).
- 558 8 Napirei, M. *et al.* Features of systemic lupus erythematosus in Dnase1-deficient mice.  
559 *Nat Genet* **25**, 177-181, doi:10.1038/76032 (2000).
- 560 9 Yasutomo, K. *et al.* Mutation of DNASE1 in people with systemic lupus  
561 erythematosus. *Nat Genet* **28**, 313-314, doi:10.1038/91070 (2001).
- 562 10 Sisirak, V. *et al.* Digestion of Chromatin in Apoptotic Cell Microparticles Prevents  
563 Autoimmunity. *Cell* **166**, 88-101, doi:10.1016/j.cell.2016.05.034 (2016).
- 564 11 Al-Mayouf, S. M. *et al.* Loss-of-function variant in DNASE1L3 causes a familial form  
565 of systemic lupus erythematosus. *Nat Genet* **43**, 1186-1188, doi:10.1038/ng.975  
566 (2011).

- 567 12 Deane, J. A. *et al.* Control of toll-like receptor 7 expression is essential to restrict  
568 autoimmunity and dendritic cell proliferation. *Immunity* **27**, 801-810,  
569 doi:10.1016/j.immuni.2007.09.009 (2007).
- 570 13 Fukui, R. *et al.* Unc93B1 restricts systemic lethal inflammation by orchestrating Toll-  
571 like receptor 7 and 9 trafficking. *Immunity* **35**, 69-81,  
572 doi:10.1016/j.immuni.2011.05.010 (2011).
- 573 14 Fukui, R. *et al.* Unc93B1 biases Toll-like receptor responses to nucleic acid in  
574 dendritic cells toward DNA- but against RNA-sensing. *J Exp Med* **206**, 1339-1350,  
575 doi:10.1084/jem.20082316 (2009).
- 576 15 Pisitkun, P. *et al.* Autoreactive B cell responses to RNA-related antigens due to TLR7  
577 gene duplication. *Science* **312**, 1669-1672, doi:10.1126/science.1124978 (2006).
- 578 16 Subramanian, S. *et al.* A Tlr7 translocation accelerates systemic autoimmunity in  
579 murine lupus. *Proc Natl Acad Sci U S A* **103**, 9970-9975,  
580 doi:10.1073/pnas.0603912103 (2006).
- 581 17 Nickerson, K. M. *et al.* TLR9 regulates TLR7- and MyD88-dependent autoantibody  
582 production and disease in a murine model of lupus. *J Immunol* **184**, 1840-1848,  
583 doi:10.4049/jimmunol.0902592 (2010).
- 584 18 Christensen, S. R. *et al.* Toll-like receptor 7 and TLR9 dictate autoantibody specificity  
585 and have opposing inflammatory and regulatory roles in a murine model of lupus.  
586 *Immunity* **25**, 417-428, doi:10.1016/j.immuni.2006.07.013 (2006).
- 587 19 Roberts, A. W. *et al.* Tissue-Resident Macrophages Are Locally Programmed for  
588 Silent Clearance of Apoptotic Cells. *Immunity* **47**, 913-927 e916,  
589 doi:10.1016/j.immuni.2017.10.006 (2017).
- 590 20 Brinkmann, M. M. *et al.* The interaction between the ER membrane protein UNC93B  
591 and TLR3, 7, and 9 is crucial for TLR signaling. *J Cell Biol* **177**, 265-275,  
592 doi:10.1083/jcb.200612056 (2007).
- 593 21 Kim, Y. M., Brinkmann, M. M., Paquet, M. E. & Ploegh, H. L. UNC93B1 delivers  
594 nucleotide-sensing toll-like receptors to endolysosomes. *Nature* **452**, 234-238,  
595 doi:10.1038/nature06726 (2008).
- 596 22 Lee, B. L. *et al.* UNC93B1 mediates differential trafficking of endosomal TLRs. *Elife* **2**,  
597 e00291, doi:10.7554/eLife.00291 (2013).

- 598 23 Casrouge, A. *et al.* Herpes simplex virus encephalitis in human UNC-93B deficiency.  
599 *Science* **314**, 308-312, doi:10.1126/science.1128346 (2006).
- 600 24 Huh, J. W. *et al.* UNC93B1 is essential for the plasma membrane localization and  
601 signaling of Toll-like receptor 5. *Proc Natl Acad Sci U S A* **111**, 7072-7077,  
602 doi:10.1073/pnas.1322838111 (2014).
- 603 25 Tabeta, K. *et al.* The Unc93b1 mutation 3d disrupts exogenous antigen presentation  
604 and signaling via Toll-like receptors 3, 7 and 9. *Nat Immunol* **7**, 156-164,  
605 doi:10.1038/ni1297 (2006).
- 606 26 Kegelman, T. P. *et al.* Targeting tumor invasion: the roles of MDA-9/Syntenin. *Expert*  
607 *Opin Ther Targets* **19**, 97-112, doi:10.1517/14728222.2014.959495 (2015).
- 608 27 Chen, F. *et al.* Syntenin negatively regulates TRAF6-mediated IL-1R/TLR4 signaling.  
609 *Cell Signal* **20**, 666-674, doi:10.1016/j.cellsig.2007.12.002 (2008).
- 610 28 Majer, O., Woo, B. J., Liu, B., Van Dis, E. & Barton, G. M. An essential checkpoint for  
611 TLR9 signaling is release from Unc93b1 in endosomes. Submitted (2018).
- 612 29 <https://www.phosphosite.org/proteinAction.action?id=14824>.
- 613 30 Tamura, K. *et al.* Increased production of intestinal immunoglobulins in Syntenin-1-  
614 deficient mice. *Immunobiology* **220**, 597-604, doi:10.1016/j.imbio.2014.12.003  
615 (2015).
- 616 31 Mali, P. *et al.* RNA-guided human genome engineering via Cas9. *Science* **339**, 823-  
617 826, doi:10.1126/science.1232033 (2013).
- 618 32 Schindelin, J. *et al.* Fiji: an open-source platform for biological-image analysis. *Nat*  
619 *Methods* **9**, 676-682, doi:10.1038/nmeth.2019 (2012).
- 620 33 Carpenter, A. E. *et al.* CellProfiler: image analysis software for identifying and  
621 quantifying cell phenotypes. *Genome Biol* **7**, R100, doi:10.1186/gb-2006-7-10-r100  
622 (2006).

623

## 624 **Acknowledgements**

625 We thank Russell Vance and members of the Barton and Vance Labs for helpful discussions and critical  
626 reading of the manuscript. We thank Angus Yiu-fai Lee and the Gene Targeting Facility of the Cancer  
627 Research Center at UC Berkeley for generating the *Unc93b1*<sup>PKP/PKP</sup> knock-in mice. We thank Lori  
628 Kohlstaedt and the Vincent J. Coates Proteomics/Mass Spectrometry Laboratory at UC Berkeley for

629 identification of Unc93b1 interacting proteins. We thank Hector Nolla and Alma Valeros for assistance  
630 with cell sorting at the Flow Cytometry Facility of the Cancer Research Laboratory at UC Berkeley. We  
631 thank Steven Ruzin and Denise Schichnes for assistance with microscopy on the Zeiss Elyra PS.1 at the  
632 Biological Imaging Center at UC Berkeley. This work was supported by the NIH (AI072429, AI105184  
633 and AI063302 to G.M.B.) and by the Lupus Research Institute (Distinguished Innovator Award to  
634 G.M.B.). O.M. was supported by an Erwin Schrödinger (J 3415-B22) and CRI Irvington postdoctoral  
635 fellowship. B.L. was supported by the UC Berkeley Tang Distinguished Scholars Program. Research  
636 reported in this publication was supported in part by the NIH S10 program under award  
637 number 1S10OD018136-01 and by the NIH S10 Instrumentation Grant S10RR025622.

638

### 639 **Author Contributions**

640 O.M., B.L., and G.M.B designed experiments. O.M. and B.L. performed experiments and analyzed the  
641 data. N.K. designed experiments and analyzed data related to mass spectrometry. G.M.B. wrote the  
642 manuscript. O.M and B.L. revised and edited the manuscript.

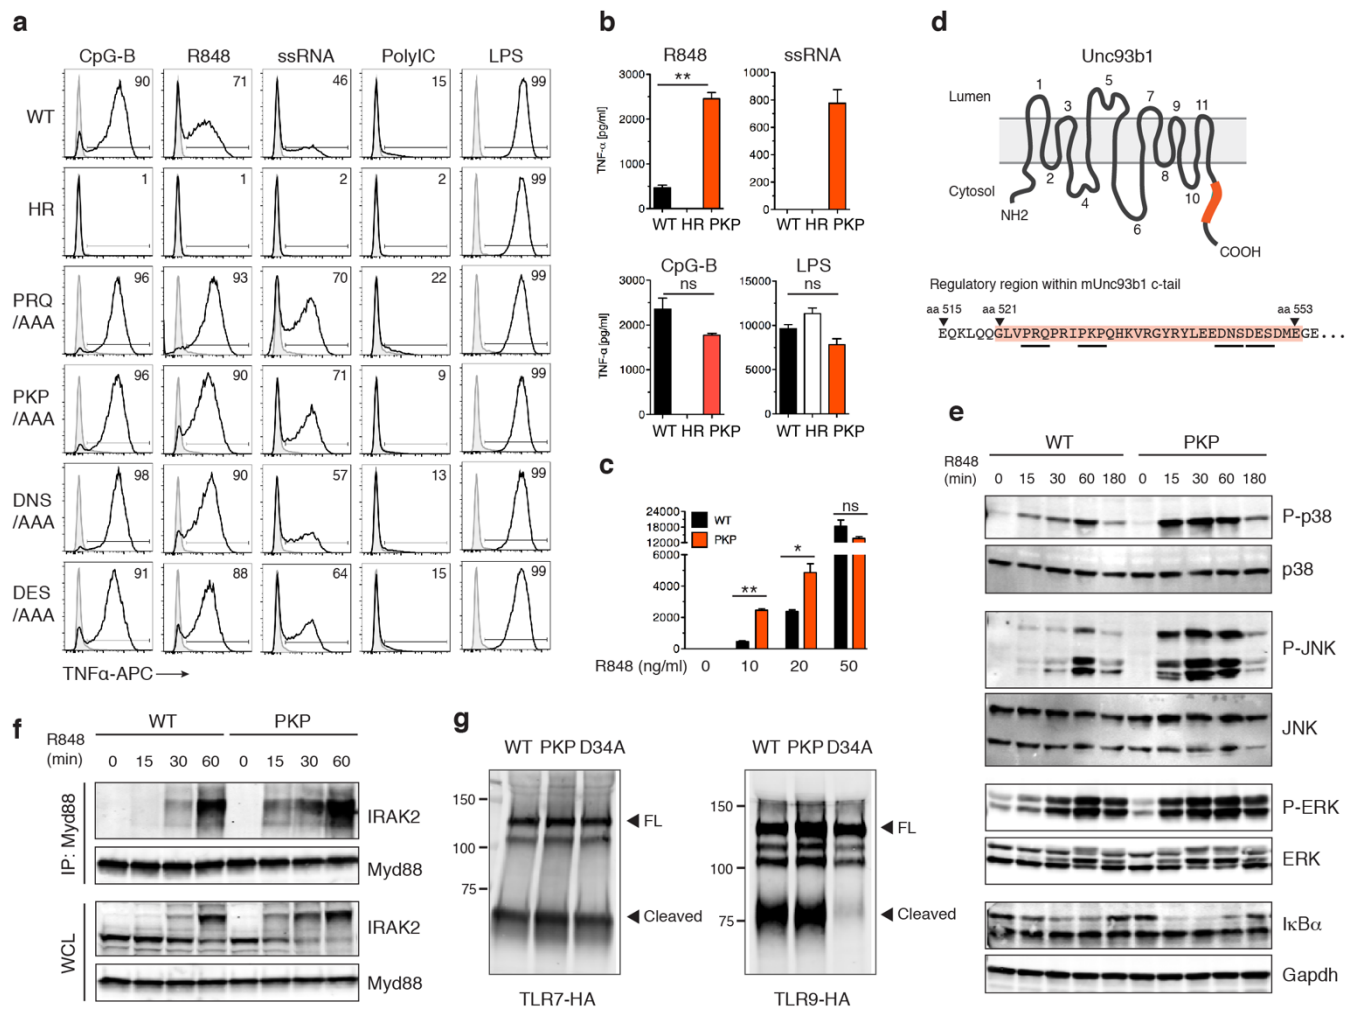

**Fig. 1. A C-terminal region in Unc93b1 regulates TLR7 responses.**

(a) Unc93b1 C-terminal mutants show enhanced TLR7 responses. Representative flow cytometry analysis showing percent TNF $\alpha$  positive cells, measured by intracellular cytokine staining, of Unc93b1-deficient RAW macrophages retrovirally transduced to express the indicated Unc93b1 alleles after stimulation with CpG-B (100 nM) for TLR9, R848 (10 ng/ml) and ssRNA40 (2.5  $\mu$ g/ml) for TLR7, PolyIC (20  $\mu$ g/ml) for TLR3, or LPS (10 ng/ml) for TLR4. (b,c) TNF $\alpha$  production, measured by ELISA, from the indicated RAW macrophage lines after stimulation for 8h with R848 (10 ng/ml), ssRNA40 (1  $\mu$ g/ml), CpG-B (25 nM), LPS (50 ng/ml), or increasing concentrations of R848 (n=3; representative of three independent repeats). (d) Domain structure of Unc93b1 with the C-terminal regulatory region indicated in orange. (e) Unc93b1<sup>PKP</sup>-expressing macrophages show enhanced TLR7 signaling. Immunoblot of P-p38, P-JNK, P-ERK, and I $\kappa$ B $\alpha$  of RAW macrophages stimulated with R848 (50 ng/ml) for indicated times. Representative of two independent experiments. (f) Enhanced Myddosome assembly in Unc93b1<sup>PKP</sup> macrophages. Immunoprecipitation of MyD88 from RAW macrophage lines expressing the indicated Unc93b1 alleles and stimulated with R848 (500 ng/ml), for indicated times followed by immunoblot for IRAK2. Input levels of Myd88 and IRAK2 in whole cell lysates (WCL) are also shown. (g) TLR7 and TLR9 trafficking are normal in Unc93b1<sup>PKP</sup> but not in Unc93b1<sup>D34A</sup> RAW lines. Immunoblot of TLR7 and TLR9 from lysates of indicated RAW macrophage lines. All data are mean  $\pm$  SD; \*p < 0.05, \*\*p < 0.01, \*\*\*p < 0.001 by unpaired Student's t-test. The data are representative of at least three independent experiments, unless otherwise noted.

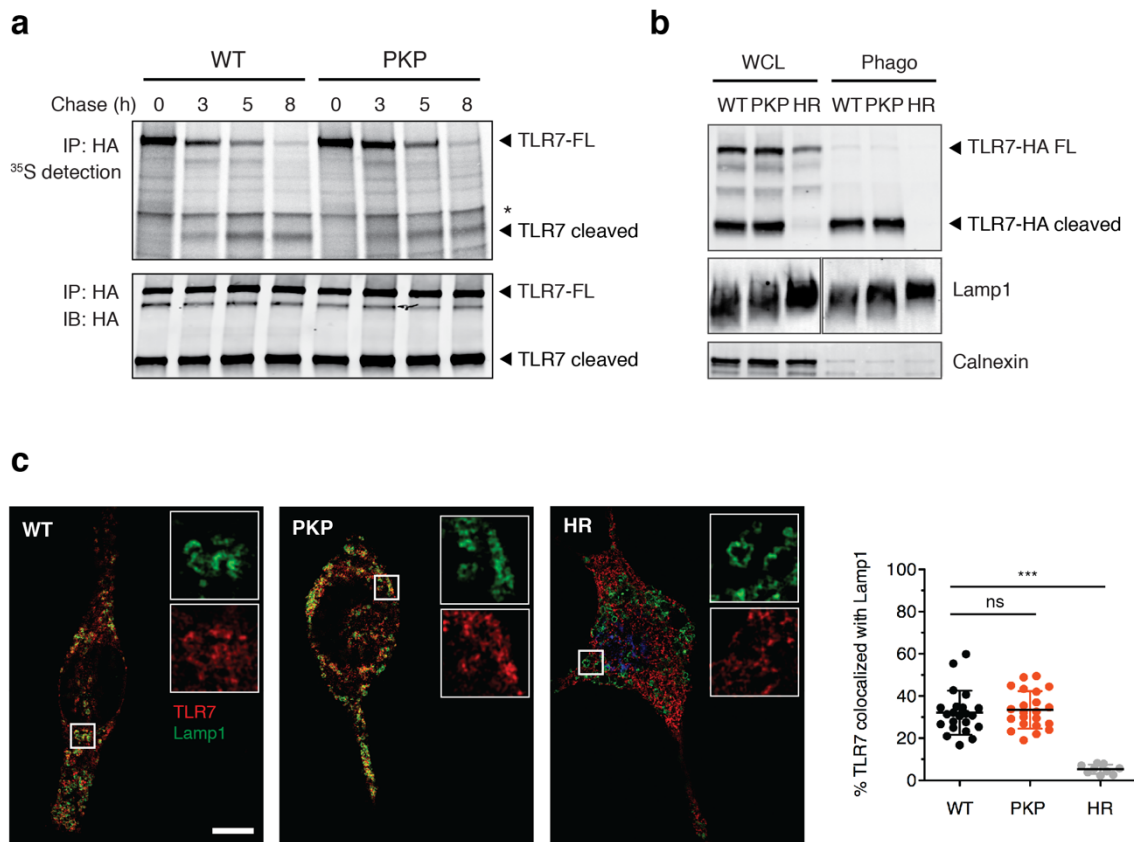

**Fig. 2. Unc93b1<sup>PKP</sup> does not alter TLR7 trafficking or localization.**

(a) Unc93b1<sup>PKP</sup> does not alter TLR7 export rates. Pulse–chase analysis of TLR7 in Unc93b1<sup>WT</sup> and Unc93b1<sup>PKP</sup>-expressing RAW macrophages. Cell lysate was HA immunoprecipitated and subjected to radiolabeled screen and immunoblot. The full-length and cleaved forms of TLR7 are indicated. An asterisk denotes a nonspecific band. Representative of two independent experiments. (b) Unc93b1<sup>PKP</sup> does not affect TLR7 trafficking to endosomes. Levels of TLR7, Lamp1, and Calnexin in whole cell lysates (WCL) or lysates of purified phagosomes from the indicated RAW macrophage lines were measured by immunoblot. Representative of three independent experiments. (c) Colocalization of TLR7 and Lamp1 in RAW macrophages expressing the indicated Unc93b1 alleles on a *Myd88*<sup>-/-</sup> background using superresolution structured illumination microscopy. Shown are representative Unc93b1<sup>WT</sup>, Unc93b1<sup>HR</sup> and Unc93b1<sup>PKP</sup> cells: TLR7 (red) and Lamp1 (green). Boxed areas are magnified. The plot shows quantification of the percentage of total TLR7 within Lamp1<sup>+</sup> endosomes with each dot representing an individual cell (pooled together from two independent experiments). Scale bars: 10  $\mu$ m. All data are mean  $\pm$  SD; \*p < 0.05, \*\*p < 0.01, \*\*\*p < 0.001 by unpaired Student’s t-test.

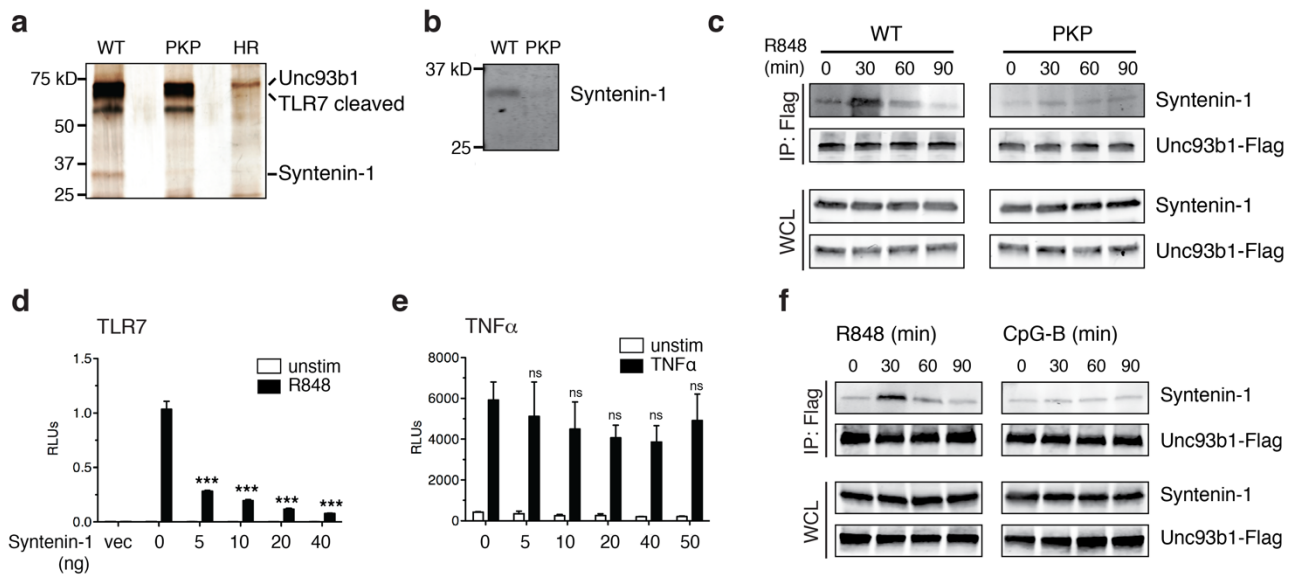

**Fig. 3. Syntenin-1 binds to the C-terminal tail of Unc93b1 and restricts TLR7 signaling.**

(a) Silver stained SDS-PAGE gel of purified Unc93b1-FLAG complexes in phagosomes enriched from RAW macrophages expressing the indicated Unc93b1 alleles. Note the 32kD protein (subsequently identified as Syntenin-1) that is less abundant in Unc93b1<sup>PKP</sup> complexes. (b) Syntenin-1 binds Unc93b1<sup>WT</sup>. Purified Unc93b1-FLAG complexes described in (a) were immunoblotted for Syntenin-1. (c) Syntenin-1 is recruited to wildtype Unc93b1 but not Unc93b1<sup>PKP</sup>. Syntenin-1 binding to Unc93b1 was measured by FLAG immunoprecipitation followed by immunoblot for Syntenin-1 from RAW macrophage lines stimulated with R848 (0.5 µg/ml) for the indicated times. Levels of Syntenin-1 and Unc93b1-FLAG in cell lysates are also shown. (d-e) Syntenin-1 suppresses TLR7 signaling. (d) NFκB activation in HEK293T cells transiently expressing TLR7 and increasing amounts of Syntenin-1 was measured using a dual luciferase reporter assay. Cells were stimulated with R848 (50 ng/ml) for 16 h prior to harvest. On-way ANOVA results: F(4/10)=48.4,  $p < 0.0001$  (e) HEK293T cells transiently expressing Syntenin-1 and stimulated with TNFα (10 ng/ml); F(5/12)=1.263,  $p = ns$ . Data are normalized to Renilla expression and expressed as relative luciferase units (RLU) (n=3-4, representative of three independent experiments). (f) Syntenin-1 is selectively recruited to Unc93b1 upon TLR7 stimulation. Interaction between Syntenin-1 and Unc93b1 was measured as described in (c) from Unc93b1<sup>WT</sup> RAW macrophages stimulated with R848 (0.5 µg/ml) or CpG-B (0.5 µM) for the indicated times. All data are mean ± SD and were analyzed with one-way ANOVA followed by a Tukey's posttest (95% confidence interval): \* $p < 0.05$ , \*\* $p < 0.01$ , \*\*\* $p < 0.001$ . The data are representative of at least three independent experiments.



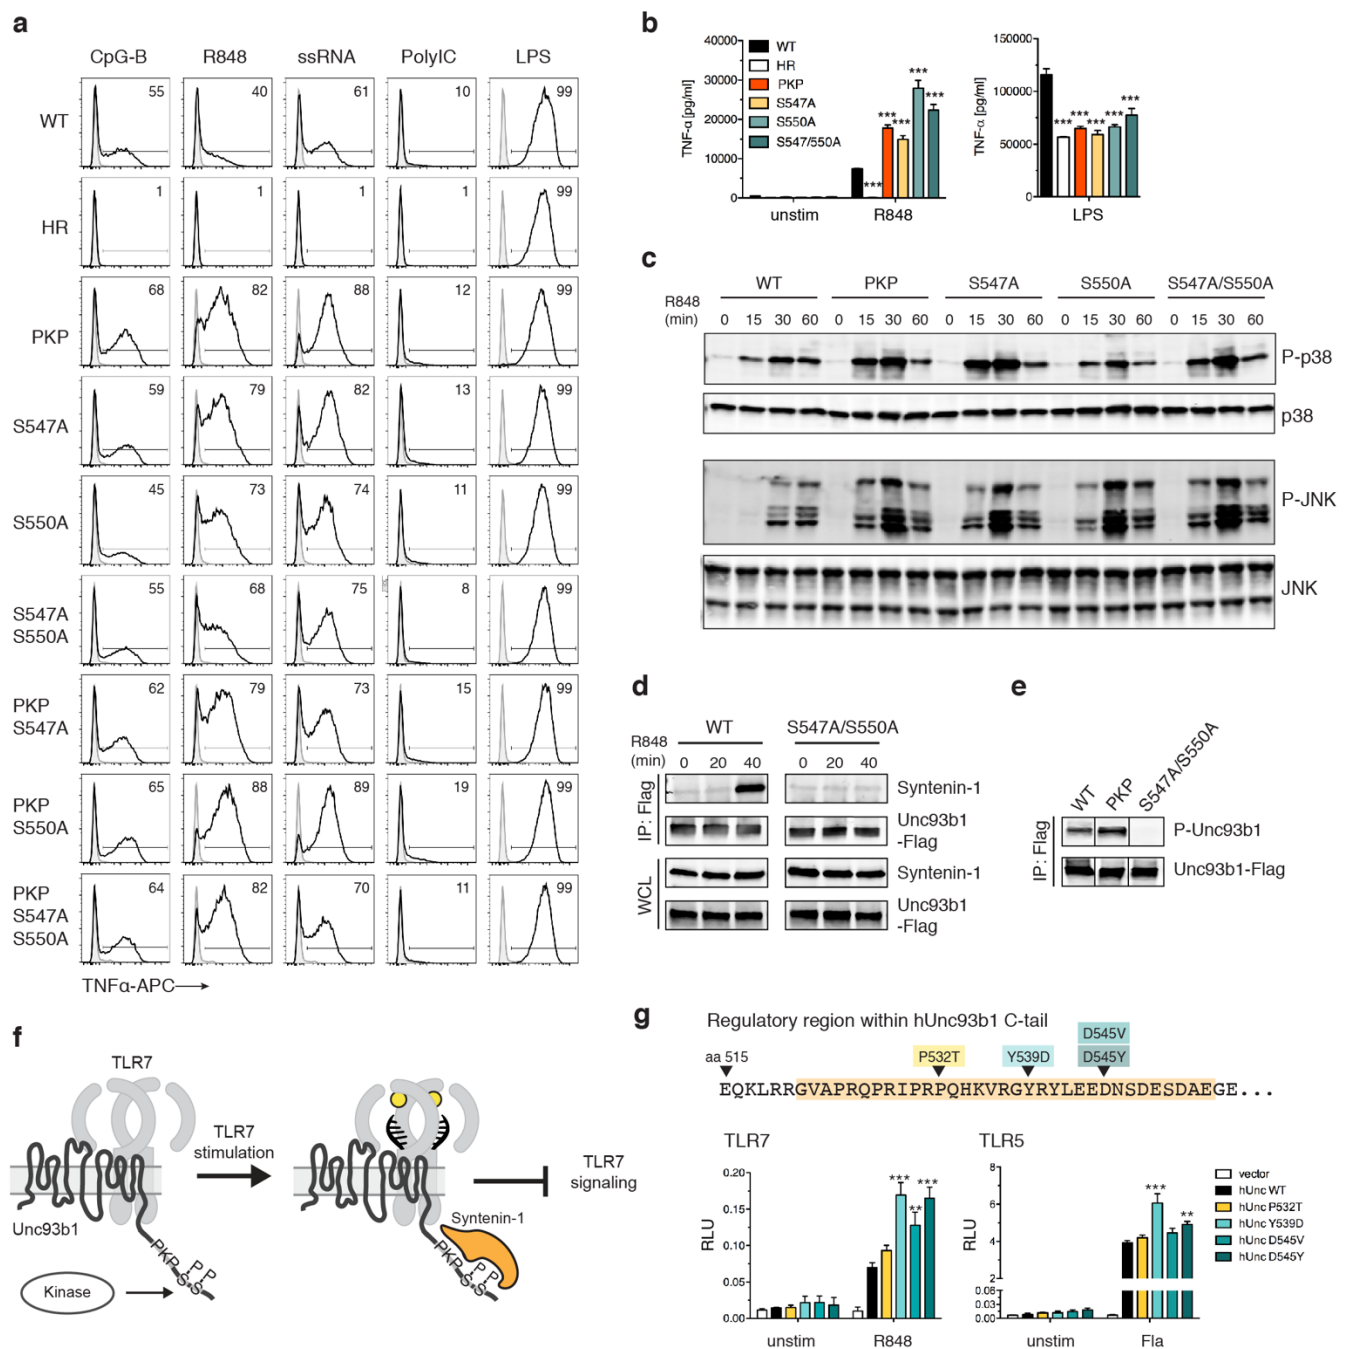

**Fig. 4. Serine phosphorylation in the C-terminal tail of Unc93b1 regulates Syntenin-1 recruitment.**

(a) Serine to alanine mutations in the C-terminal tail of Unc93b1 lead to enhanced TLR7 responses.

Representative flow cytometry analysis showing percent TNF $\alpha$  positive cells, measured by intracellular cytokine staining, of Unc93b1-deficient RAW macrophages complemented with the indicated mutant alleles and stimulated with CpG-B (10 nM) for TLR9, R848 (10 ng/ml) and ssRNA40 (1  $\mu$ g/ml) for TLR7, PolyIC (20  $\mu$ g/ml) for TLR3, or LPS (10 ng/ml) for TLR4. (b) TNF $\alpha$  production, measured by ELISA, from the indicated RAW macrophage lines after stimulation for 8 h with R848 (20 ng/ml), or LPS (50 ng/ml) (n=3; representative of three independent experiments. One-way ANOVA results for R848 groups: F(5/12)=247.2,  $p$ <0.0001; LPS groups: F(5/12)=93.59,  $p$ <0.0001). (c) Levels of phospho-p38 and phospho-JNK, as measured by immunoblot, in lysates of the indicated RAW macrophage cells stimulated with R848 (50 ng/ml). (d) Phosphorylation of Ser547 and Ser550 is required for Syntenin-1 binding to Unc93b1. Syntenin-1 binding to Unc93b1<sup>WT</sup> or

Unc93b1<sup>S547A/S550A</sup> in RAW macrophages stimulated with R848 (0.5 µg/ml) was measured by Unc93b1-FLAG immunoprecipitation followed by immunoblot for Syntenin-1. Levels of Syntenin-1 and Unc93b1-FLAG in cell lysates are also shown. (e) Unc93b1<sup>PKP</sup> is phosphorylated. Unc93b1-FLAG was immunoprecipitated from lysates of the indicated RAW macrophage lines and phosphorylation of Ser547 and Ser550 was measured by immunoblot with phospho-specific antibodies. Each blot was performed on the same membrane but cropped to present relevant lanes. (f) A model of Syntenin-mediated TLR7 restriction. (g) Genetic variation in the human Unc93b1 C-terminal regulatory region increases TLR7 responses. NFκB activation in HEK293T cells transiently expressing TLR7 or TLR5 and the indicated human Unc93b1 alleles was measured using a dual luciferase reporter assay. Cells were stimulated with R848 (10 ng/ml) or ultrapure Flagellin (2 ng/ml) for 16 h prior to harvest. Data are normalized to Renilla expression and expressed as relative luciferase units (RLUs) (n=4, representative of three independent experiments. On-way ANOVA results for TLR7 groups: F(4/10)=20.03,  $p<0.0001$ ; TLR5 groups: F(4/10)=28.69,  $p<0.0001$ ). All data are mean ± SD; data were analyzed with one-way ANOVA followed by a Tukey's posttest (95% confidence interval): \* $p < 0.05$ , \*\* $p < 0.01$ , \*\*\* $p < 0.001$ . The data are representative of at least three independent experiments, unless otherwise noted.

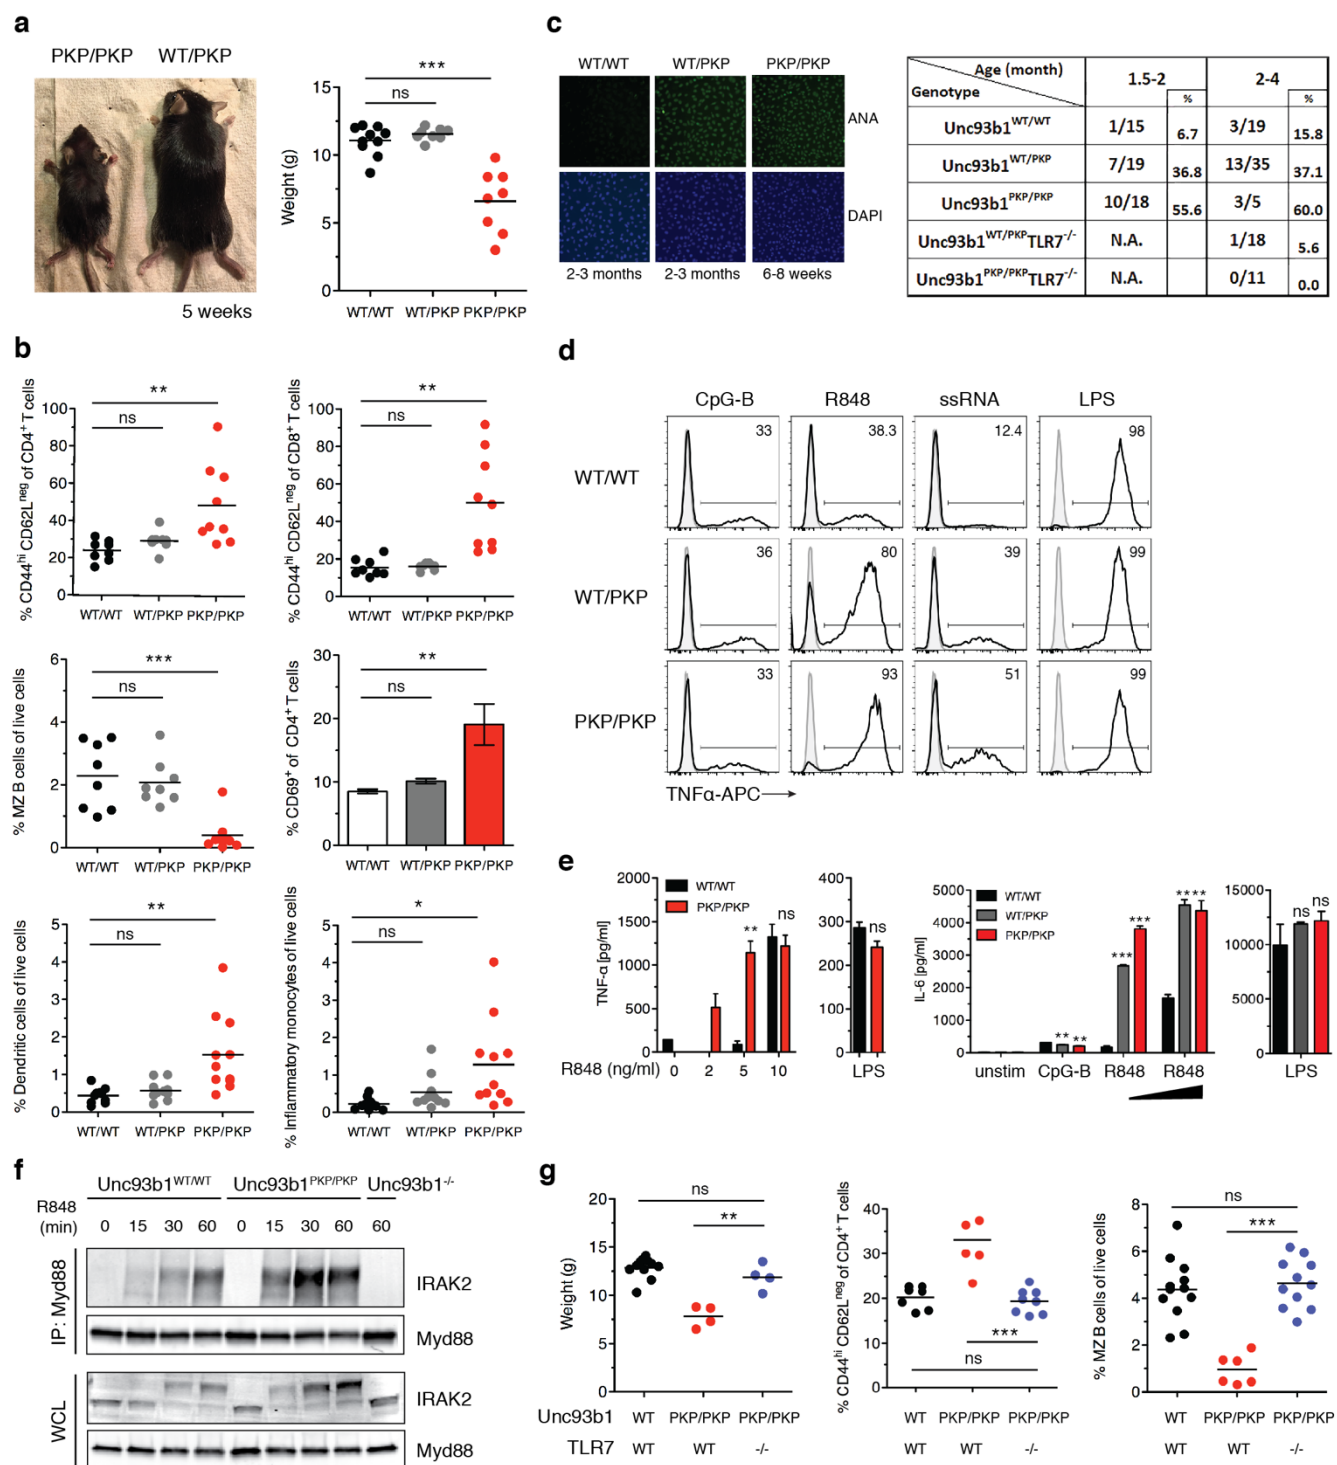

**Fig. 5. Unc93b1<sup>PKP</sup> knock-in mice develop TLR7-driven systemic inflammation and autoimmunity.**

(a) Gross appearance and weights of *Unc93b1<sup>PKP/PKP</sup>* mice compared to littermate controls. (b) *Unc93b1<sup>PKP/PKP</sup>* mice exhibit systemic inflammation. Flow cytometry analysis of major immune cell subsets in *Unc93b1<sup>WT/WT</sup>*, *Unc93b1<sup>PKP/WT</sup>*, and *Unc93b1<sup>PKP/PKP</sup>* mice at 6-8 weeks of age. Frequencies of CD44<sup>high</sup> CD62L<sup>neg</sup> of CD4<sup>+</sup> T cells or of CD8<sup>+</sup> T cells in spleen, marginal zone (MZ) B cells (CD21<sup>+</sup>CD23<sup>neg</sup>IgM<sup>+</sup>CD1d<sup>+</sup>) in spleen, CD69<sup>+</sup> of CD4<sup>+</sup> T cells in lymph nodes, dendritic cells (CD11b<sup>+</sup> CD11c<sup>+</sup> MHC-II<sup>high</sup>) in lymph nodes, and inflammatory monocytes (CD11b<sup>+</sup>Ly6c<sup>+</sup>Ly6G<sup>neg</sup>) in lymph nodes are shown. Data points were pooled from four independent experiments. (c) *Unc93b1<sup>PKP/PKP</sup>* mice develop anti-nuclear antibodies (ANA) early in life. Representative staining

(left) and tabulated results (right) of Hep-2 slides using sera (diluted 1:80) from the indicated mouse ages and genotypes. **(d)** Cells from *Unc93b1*<sup>PKP/WT</sup> and *Unc93b1*<sup>PKP/PKP</sup> mice show enhanced TLR7 responses. Representative flow cytometry analysis showing percent TNF $\alpha$  positive cells, measured by intracellular cytokine staining, of bone marrow-derived dendritic cells derived from *Unc93b1*<sup>WT/WT</sup>, *Unc93b1*<sup>PKP/WT</sup>, and *Unc93b1*<sup>PKP/PKP</sup> mice after stimulation with CpG-B (150 nM) for TLR9, R848 (10 ng/ml) and ssRNA40 (1  $\mu$ g/ml) for TLR7, or LPS (10 ng/ml) for TLR4. **(e)** TNF $\alpha$  and IL-6 production, measured by ELISA and CBA respectively, of bone marrow-derived macrophages from the indicated mouse genotypes after stimulation for 8h with CpG-B (500 nM), LPS (50 ng/ml), or increasing concentrations of R848 (n=3). **(f)** Enhanced Myddosome assembly in macrophages from *Unc93b1*<sup>PKP/PKP</sup> mice. Immunoprecipitation of Myd88 from bone marrow-derived macrophages from the indicated mice after stimulation with R848 (500 ng/ml), followed by immunoblot for IRAK2. Input levels of Myd88 and IRAK2 in whole cell lysates (WCL) are also shown. **(g)** TLR7 deficiency rescues disease in *Unc93b1*<sup>PKP/PKP</sup> mice. Body weights of 6-week-old mice with indicated genotypes are shown in the left panel. Frequencies of CD44<sup>high</sup> CD62L<sup>neg</sup> of CD4<sup>+</sup> T cells, and marginal zone (MZ) B cells (CD21<sup>+</sup>CD23<sup>neg</sup>IgM<sup>+</sup>CD1d<sup>+</sup>) in spleens are shown in the middle and right panels. Data points were pooled together from three independent experiments. All data are mean  $\pm$  SD; \*p < 0.05, \*\*p < 0.01, \*\*\*p < 0.001 by unpaired Student's t-test.

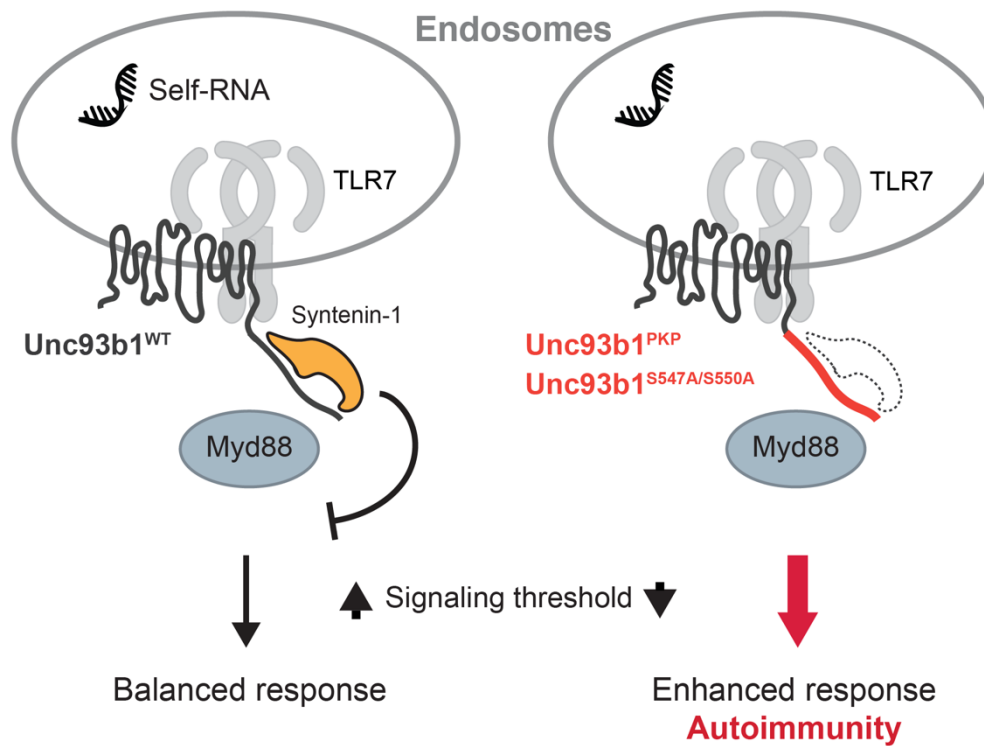

**Fig. 6. Model of Syntenin-1-mediated restriction of TLR7 signaling.**

The negative regulator Syntenin-1 binds to the C-terminal cytosolic tail of Unc93b1 to dampen TLR7 signaling and prevent responses to self RNA. Disruption of the Syntenin-1 binding site in Unc93b1 prevents Syntenin-1 recruitment and lowers the threshold for TLR7 activation, leading to TLR7-driven autoimmunity.

Supplementary Materials for

**Unc93b1 recruits Syntenin-1 to dampen TLR7 signaling and prevent autoimmunity**

Olivia Majer, Bo Liu, Nevan Krogan, and Gregory M. Barton

Correspondence to: [barton@berkeley.edu](mailto:barton@berkeley.edu)

**This PDF file includes:**

Figs. S1 to S6

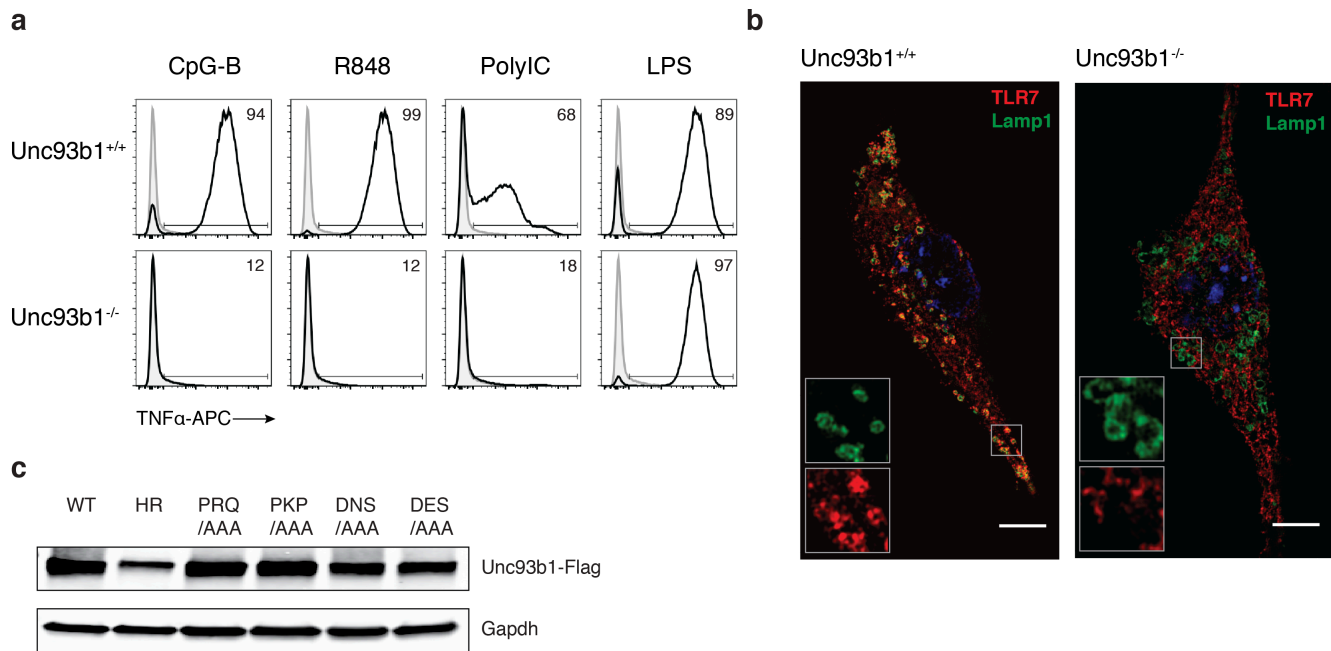

**Fig. S1: Generation and validation of Unc93b1-deficient RAW macrophages.**

(a) Unc93b1-deficient RAW macrophages are unresponsive to nucleic acid ligands. Representative flow cytometry analysis showing percent TNF $\alpha$  positive cells, measured by intracellular cytokine staining, of WT and Unc93b1-deficient RAW macrophage line, generated by CRISPR/Cas9, after stimulation with CpG-B (1  $\mu$ M) for TLR9, R848 (400 ng/ml) for TLR7, PolyIC (20  $\mu$ g/ml) for TLR3, or LPS (10 ng/ml) for TLR4. (b) TLR7 does not traffic to endosomes in Unc93b1-deficient RAW macrophages. Colocalization of TLR7 and Lamp1 in RAW macrophages expressing the indicated Unc93b1 alleles using superresolution structured illumination microscopy. Representative images are shown with TLR7 (red) and Lamp1 (green). (c) Unc93b1 expression levels, as measured by FLAG immunoblot, of Unc93b1-deficient RAW macrophages retrovirally transduced to express the indicated Unc93b1 alleles. These same cell lines are used for experiments shown in Fig. 1a. The data are representative of at least three independent experiments, unless otherwise noted.

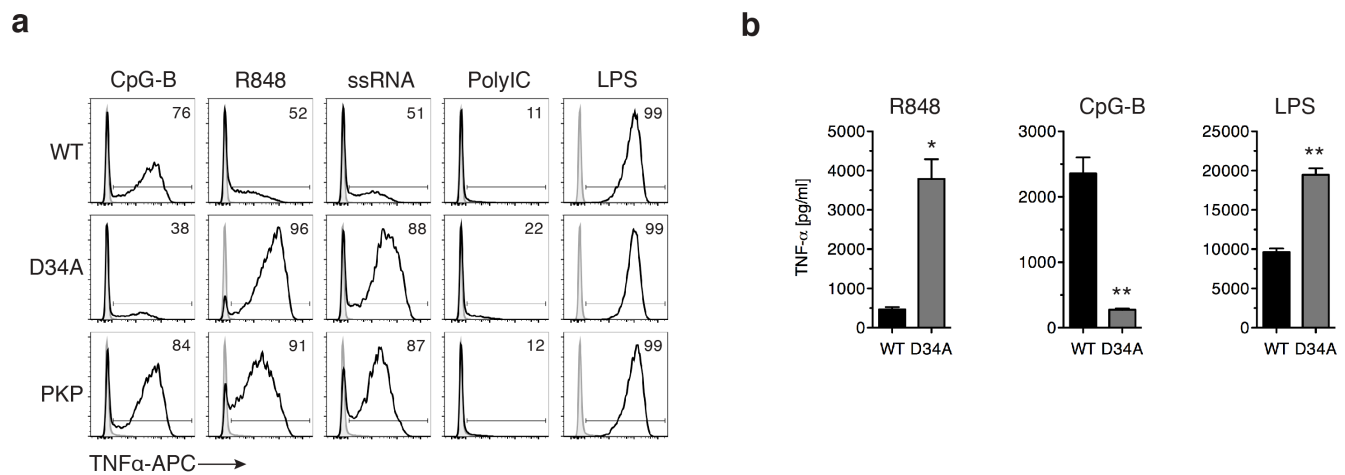

**Fig. S2: *Unc93b1*<sup>PKP</sup> does not alter TLR9 responses, unlike *Unc93b1*<sup>D34A</sup>.**

(a) Representative flow cytometry analysis showing percent TNFα positive cells, measured by intracellular cytokine staining, of indicated RAW macrophage lines after stimulation with CpG-B (25 nM) for TLR9, R848 (10 ng/ml) and ssRNA40 (1 μg/ml) for TLR7, PolyIC (20 μg/ml) for TLR3, or LPS (10 ng/ml) for TLR4. Representative of three independent experiments. (b) TNFα production, measured by ELISA, from the indicated RAW macrophage lines after stimulation for 8h with R848 (10 ng/ml), CpG-B (25 nM), or LPS (50 ng/ml) (n=3, representative of two independent experiments). All data are mean ± SD; \*p < 0.05, \*\*p < 0.01, \*\*\*p < 0.001 by unpaired Student's t-test.



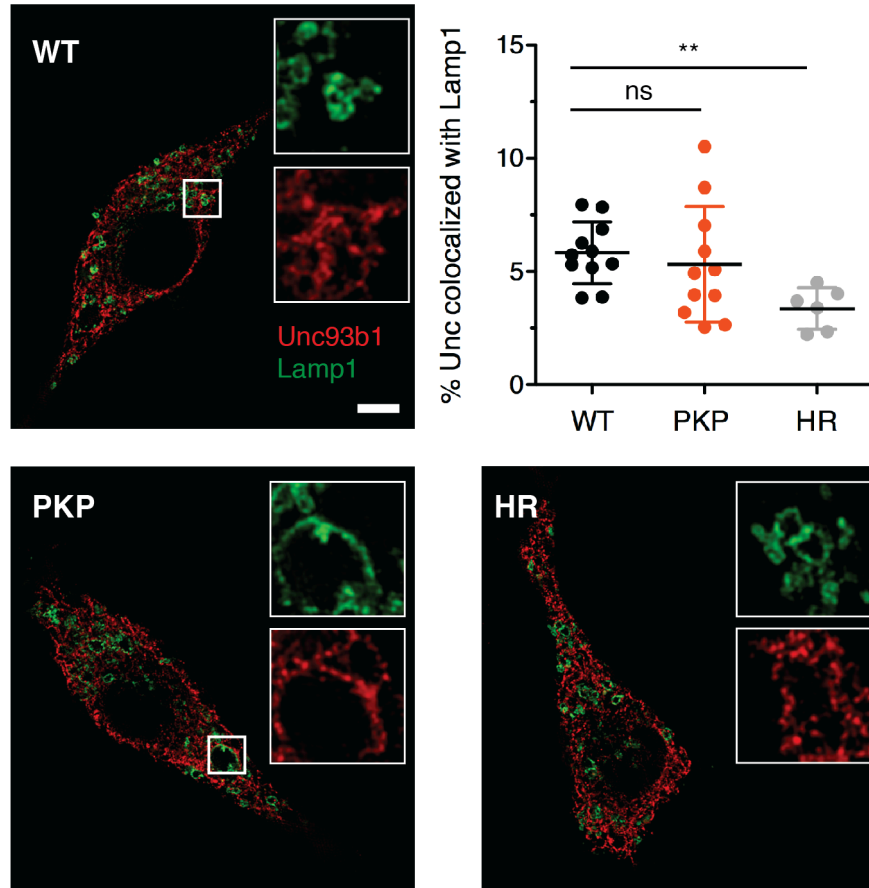

**Fig. S3: The sub-cellular localization of Unc93b1<sup>PKP</sup> is not altered relative to Unc93b1<sup>WT</sup>.**

Colocalization of Unc93b1 (red) and Lamp1 (green) was measured using superresolution structured illumination microscopy in Unc93b1-deficient RAW macrophages complemented with Unc93b1<sup>WT</sup>, Unc93b1<sup>PKP</sup>, or Unc93b1<sup>H412R</sup>. A representative cell is shown for each Unc93b1 allele. Boxed areas are magnified. The plot shows quantification of the percentage of total Unc93b1 within Lamp1<sup>+</sup> endosomes with each dot representing an individual cell (imaged in a single experiment). Scale bars: 10 $\mu$ m. Data is presented as mean  $\pm$  SD; \*\*p < 0.01 by unpaired Student's t-test.

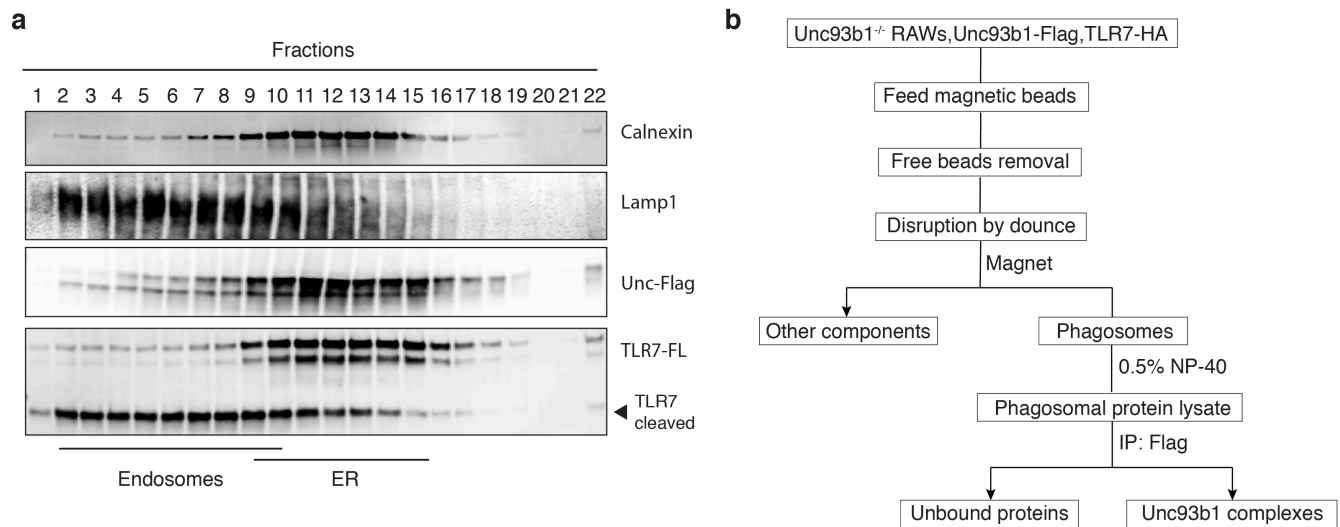

**Fig. S4: Mass spectrometry analysis of Unc93b1 complexes.**

(a) A small fraction of Unc93b1 resides in endosomes compared to the endoplasmic reticulum (ER). Sub-cellular fractionation of TLR7-HA, Unc93b1-FLAG expressing RAW macrophages was performed by density-gradient centrifugation. The distribution of Calnexin (ER), Lamp1 (late endosomes and lysosomes), Unc93b1, and TLR7 across fractions was measured by immunoblot. Representative of three independent experiments. (b) Workflow for isolation of phagosomes from RAW macrophages and purification of Unc93b1-FLAG complexes from phagosome lysates.

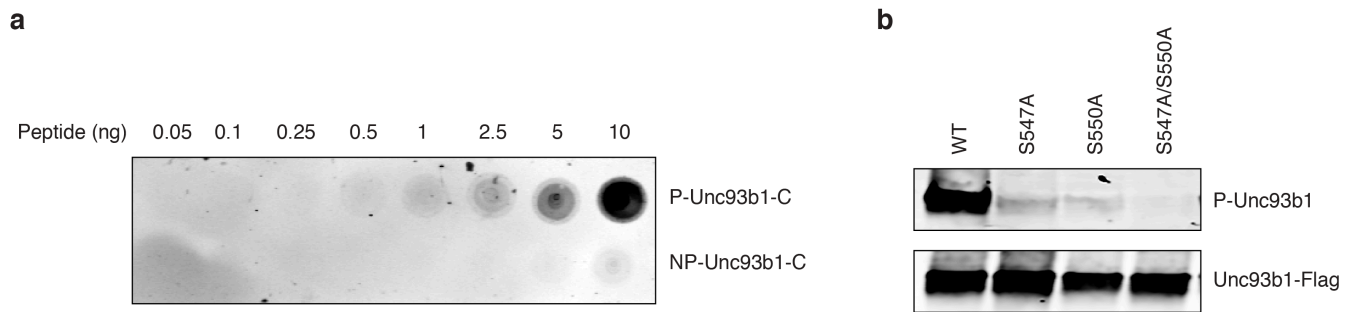

**Fig. S5: Validation of the anti-phospho-Unc93b1 polyclonal Unc93b1 antibody.**

**(a)** Immunoblots demonstrating the specificity of the phosphospecific antibodies generated against Ser547 and Ser550 in the Unc93b1 C-tail. Varying quantities of synthesized peptides corresponding to the Unc93b1 C-terminal regulatory region with (P-Unc93b1-C) and without (NP-Unc93b1-C) phosphorylated Ser547 and Ser550 were blotted to membrane and probed with rabbit phospho-specific, affinity-purified polyclonal IgG. Representative of two independent experiments. **(b)** The phospho-specific polyclonal antibody detects both phosphorylated Ser547 and Ser550. Unc93b1 was isolated from Unc93b1-deficient RAW macrophages expressing Unc93b1<sup>S547A</sup>, Unc93b1<sup>S550A</sup>, or Unc93b1<sup>S547A/S550A</sup> by FLAG immunoprecipitation followed by immunoblot with the phospho-specific polyclonal antibody. Representative of at least three independent experiments.

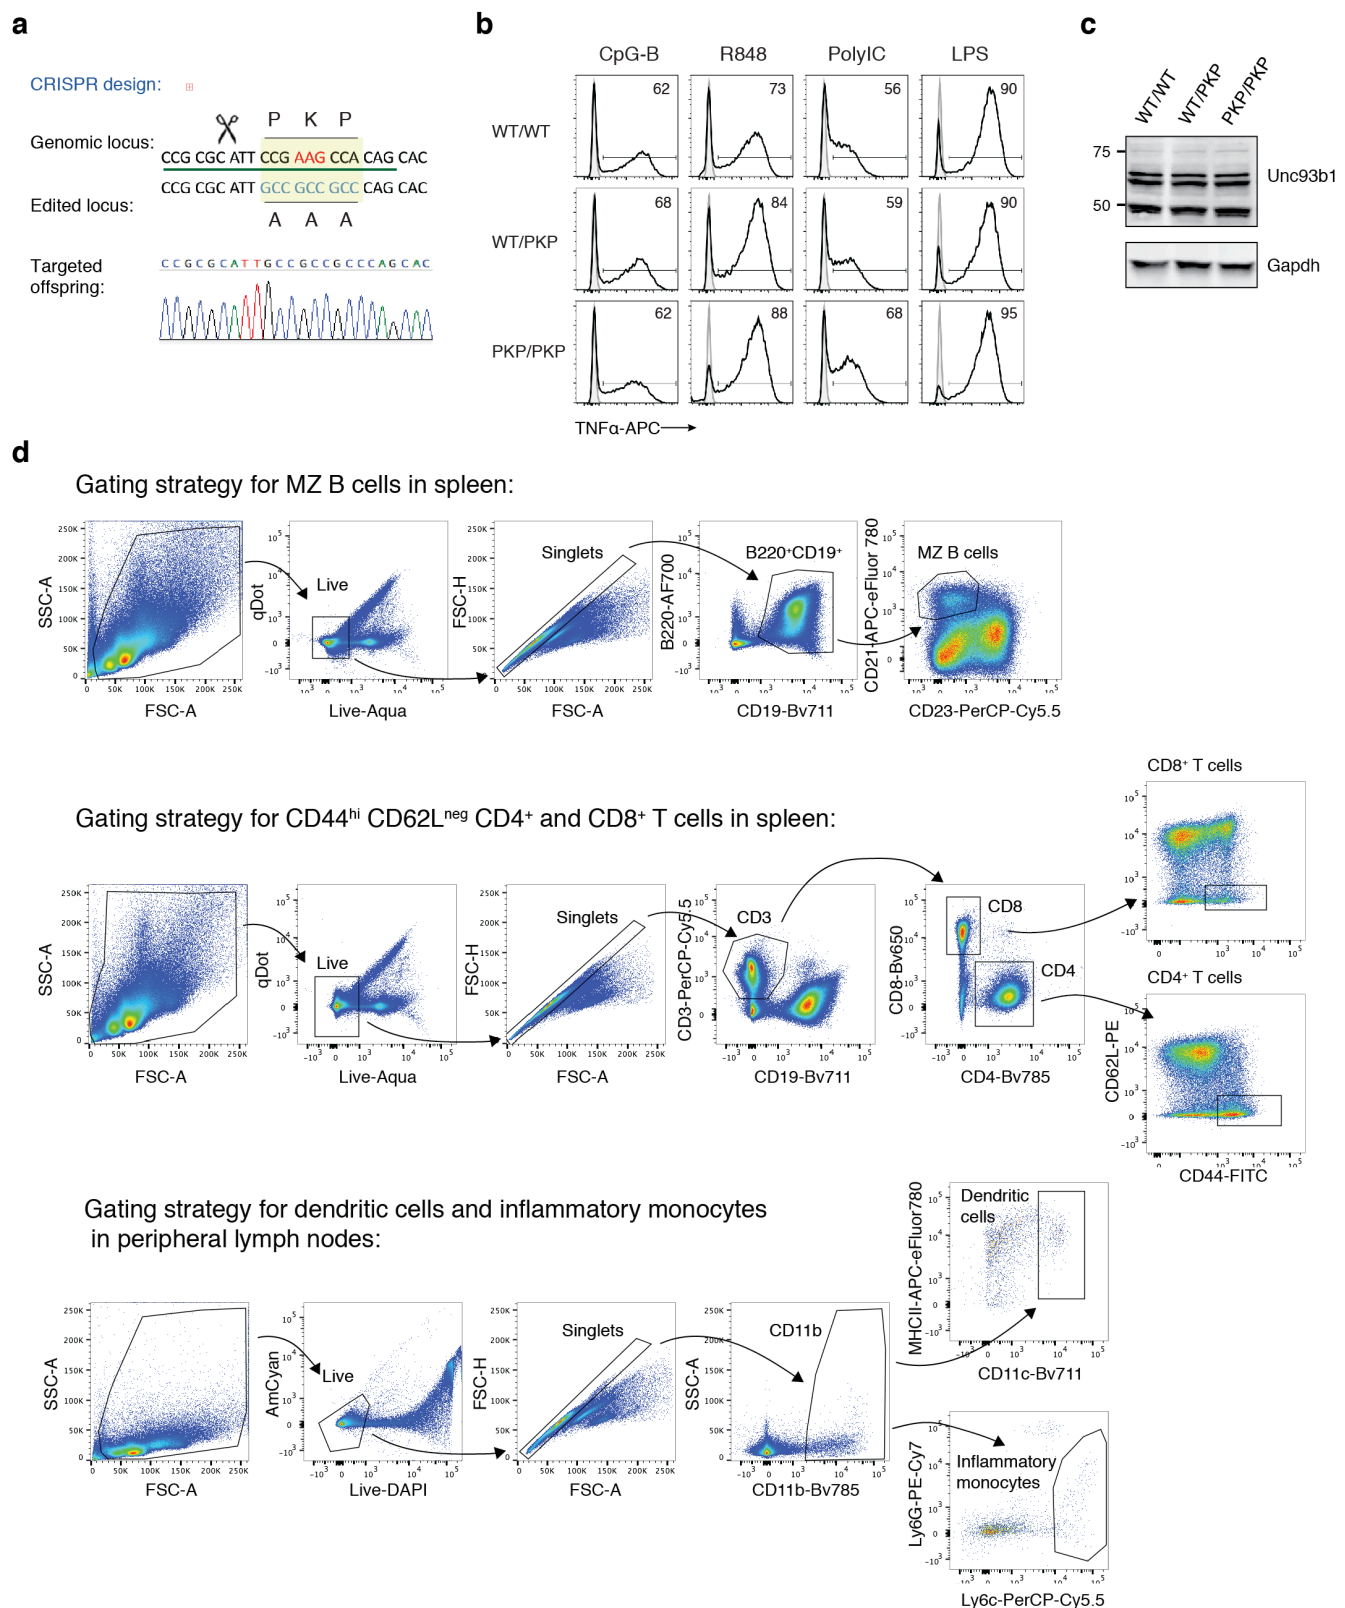

**Fig. S6: *Unc93b1*<sup>PKP</sup> knock-in mice develop systemic inflammation.**

(a) CRISPR/Cas-9 strategy to generate *Unc93b1*<sup>PKP</sup> knock-in mice. (b) Representative flow cytometry analysis showing percent TNF $\alpha$  positive cells, measured by intracellular cytokine staining, of bone marrow-derived macrophages derived from *Unc93b1*<sup>WT/WT</sup>, *Unc93b1*<sup>PKP/WT</sup>, and *Unc93b1*<sup>PKP/PKP</sup> mice after stimulation with CpG-B (150 nM) for TLR9, R848 (10 ng/ml) for TLR7, PolyIC (10  $\mu$ g/ml) for TLR3, or LPS (10 ng/ml) for TLR4. (c)

Unc93b1 protein levels in bone marrow-derived macrophages from indicated mouse genotypes, measured by immunoblot with polyclonal antibodies against endogenous Unc93b1. **(d)** Representative gating strategies for marginal zone (MZ) B cells, activated T cells, dendritic cells and inflammatory monocytes are shown. These strategies were used for the data presented in Figure 5.
